# Supplementary material for: The geologic history of marine dissolved organic carbon from iron oxides
Source: Nature. 2025 Aug 13;644(8078):945–51. doi: 10.1038/s41586-025-09383-3 (PMC12390840; doi:10.1038/s41586-025-09383-3)
Supplement: Supplementary file 3 — Goethite synthesis experimental results. [file 41586_2025_9383_MOESM3_ESM.xlsx]

## Sheet: Dataset S1
pH	Temperature (°C)	Time (days)	Fe(III) source	DOC type	DOC addition	Fe-OC (wt. %)	δ13C (‰, VPDB)	Δ13C (‰)	Protocol stage	DOC/Fe(III)	Fe (mM)	C (mM)
11.5	25	7	FeCl3x6H2O	Fulvic acid	post	0.0199595	-18.3312	4.41017	raw	0.00175667	50	0.0878333
11.5	25	7	FeCl3x6H2O	Fulvic acid	post	0.0205731	-18.5916	4.67063	raw	0.00175667	50	0.0878333
11.5	25	7	FeCl3x6H2O	Fulvic acid	post	0.0203006	-18.3908	4.46979	raw	0.00175667	50	0.0878333
11.5	25	7	FeCl3x6H2O	Fulvic acid	post	0.014115	-26.2925	12.3715	-Fh/PC	0.00175667	50	0.0878333
11.5	25	7	FeCl3x6H2O	Fulvic acid	post	0.0144551	-26.2203	12.2993	-Fh/PC	0.00175667	50	0.0878333
11.5	25	7	FeCl3x6H2O	Fulvic acid	post	0.0140742	-26.282	12.361	-Fh/PC	0.00175667	50	0.0878333
11.5	25	7	FeCl3x6H2O	Fulvic acid	post	0.00989837	-26.9672	13.0462	-Fh/PC -ads. OC	0.00175667	50	0.0878333
11.5	25	7	FeCl3x6H2O	Fulvic acid	post	0.00975118	-27.2475	13.3265	-Fh/PC -ads. OC	0.00175667	50	0.0878333
11.5	25	7	FeCl3x6H2O	Fulvic acid	post	0.00975551	-26.9567	13.0357	-Fh/PC -ads. OC	0.00175667	50	0.0878333
11.5	25	7	FeCl3x6H2O	Fulvic acid	post	0.204371	-19.9536	6.03256	raw	0.01798	50	0.899
11.5	25	7	FeCl3x6H2O	Fulvic acid	post	0.210951	-19.9316	6.01059	raw	0.01798	50	0.899
11.5	25	7	FeCl3x6H2O	Fulvic acid	post	0.207302	-19.9379	6.01687	raw	0.01798	50	0.899
11.5	25	7	FeCl3x6H2O	Fulvic acid	post	0.12807	-22.6973	8.77628	-Fh/PC	0.01798	50	0.899
11.5	25	7	FeCl3x6H2O	Fulvic acid	post	0.124891	-22.531	8.60996	-Fh/PC	0.01798	50	0.899
11.5	25	7	FeCl3x6H2O	Fulvic acid	post	0.125537	-22.5874	8.66645	-Fh/PC	0.01798	50	0.899
11.5	25	7	FeCl3x6H2O	Fulvic acid	post	0.106179	-23.6659	9.7449	-Fh/PC -ads. OC	0.01798	50	0.899
11.5	25	7	FeCl3x6H2O	Fulvic acid	post	0.108288	-23.464	9.54302	-Fh/PC -ads. OC	0.01798	50	0.899
11.5	25	7	FeCl3x6H2O	Fulvic acid	post	0.103005	-23.6805	9.75954	-Fh/PC -ads. OC	0.01798	50	0.899
11.5	25	7	FeCl3x6H2O	Fulvic acid	post	0.567991	-15.4828	1.5618	raw	0.157893	50	7.89467
11.5	25	7	FeCl3x6H2O	Fulvic acid	post	0.585661	-15.5806	1.6596	raw	0.157893	50	7.89467
11.5	25	7	FeCl3x6H2O	Fulvic acid	post	0.577863	-15.5934	1.67236	raw	0.157893	50	7.89467
11.5	25	7	FeCl3x6H2O	Fulvic acid	post	0.401883	-17.6378	3.7168	-Fh/PC	0.157893	50	7.89467
11.5	25	7	FeCl3x6H2O	Fulvic acid	post	0.411536	-18.0469	4.12593	-Fh/PC	0.157893	50	7.89467
11.5	25	7	FeCl3x6H2O	Fulvic acid	post	0.400471	-17.769	3.84801	-Fh/PC	0.157893	50	7.89467
11.5	25	7	FeCl3x6H2O	Fulvic acid	post	0.281462	-15.188	1.267	-Fh/PC -ads. OC	0.157893	50	7.89467
11.5	25	7	FeCl3x6H2O	Fulvic acid	post	0.277717	-15.1324	1.21144	-Fh/PC -ads. OC	0.157893	50	7.89467
11.5	25	7	FeCl3x6H2O	Fulvic acid	post	0.277609	-15.116	1.19496	-Fh/PC -ads. OC	0.157893	50	7.89467
11.5	25	7	FeCl3x6H2O	Fulvic acid	pre	0.0258225	-15.7674	1.84636	raw	0.00227333	50	0.113667
11.5	25	7	FeCl3x6H2O	Fulvic acid	pre	0.0266247	-15.5718	1.65076	raw	0.00227333	50	0.113667
11.5	25	7	FeCl3x6H2O	Fulvic acid	pre	0.0262712	-15.351	1.43005	raw	0.00227333	50	0.113667
11.5	25	7	FeCl3x6H2O	Fulvic acid	pre	0.0182659	-27.0393	13.1183	-Fh/PC	0.00227333	50	0.113667
11.5	25	7	FeCl3x6H2O	Fulvic acid	pre	0.0187175	-27.0812	13.1602	-Fh/PC	0.00227333	50	0.113667
11.5	25	7	FeCl3x6H2O	Fulvic acid	pre	0.018219	-27.1073	13.1863	-Fh/PC	0.00227333	50	0.113667
11.5	25	7	FeCl3x6H2O	Fulvic acid	pre	0.0116166	-25.3845	11.4635	-Fh/PC -ads. OC	0.00227333	50	0.113667
11.5	25	7	FeCl3x6H2O	Fulvic acid	pre	0.0127005	-25.4525	11.5315	-Fh/PC -ads. OC	0.00227333	50	0.113667
11.5	25	7	FeCl3x6H2O	Fulvic acid	pre	0.013742	-25.8312	11.9102	-Fh/PC -ads. OC	0.00227333	50	0.113667
11.5	25	7	FeCl3x6H2O	Fulvic acid	pre	0.17717	-18.2935	4.37251	raw	0.0156033	50	0.780167
11.5	25	7	FeCl3x6H2O	Fulvic acid	pre	0.182387	-18.5487	4.62774	raw	0.0156033	50	0.780167
11.5	25	7	FeCl3x6H2O	Fulvic acid	pre	0.180733	-18.5749	4.6539	raw	0.0156033	50	0.780167
11.5	25	7	FeCl3x6H2O	Fulvic acid	pre	0.135283	-23.9075	9.98653	-Fh/PC	0.0156033	50	0.780167
11.5	25	7	FeCl3x6H2O	Fulvic acid	pre	0.139193	-23.623	9.70201	-Fh/PC	0.0156033	50	0.780167
11.5	25	7	FeCl3x6H2O	Fulvic acid	pre	0.132965	-23.8364	9.9154	-Fh/PC	0.0156033	50	0.780167
11.5	25	7	FeCl3x6H2O	Fulvic acid	pre	0.079693	-23.441	9.52	-Fh/PC -ads. OC	0.0156033	50	0.780167
11.5	25	7	FeCl3x6H2O	Fulvic acid	pre	0.0813213	-23.6596	9.73862	-Fh/PC -ads. OC	0.0156033	50	0.780167
11.5	25	7	FeCl3x6H2O	Fulvic acid	pre	0.0770958	-23.6575	9.73653	-Fh/PC -ads. OC	0.0156033	50	0.780167
11.5	25	7	FeCl3x6H2O	Fulvic acid	pre	0.574468	-13.4577	-0.463259	raw	0.155	50	7.75
11.5	25	7	FeCl3x6H2O	Fulvic acid	pre	0.566633	-13.6439	-0.277067	raw	0.155	50	7.75
11.5	25	7	FeCl3x6H2O	Fulvic acid	pre	0.569926	-13.7496	-0.171418	raw	0.155	50	7.75
11.5	25	7	FeCl3x6H2O	Fulvic acid	pre	0.335551	-16.0184	2.09741	-Fh/PC	0.155	50	7.75
11.5	25	7	FeCl3x6H2O	Fulvic acid	pre	0.339014	-16.1272	2.2062	-Fh/PC	0.155	50	7.75
11.5	25	7	FeCl3x6H2O	Fulvic acid	pre	0.337696	-15.9672	2.04615	-Fh/PC	0.155	50	7.75
11.5	25	7	FeCl3x6H2O	Fulvic acid	pre	0.278886	-15.4494	1.52837	-Fh/PC -ads. OC	0.155	50	7.75
11.5	25	7	FeCl3x6H2O	Fulvic acid	pre	0.280679	-15.5038	1.58277	-Fh/PC -ads. OC	0.155	50	7.75
11.5	25	7	FeCl3x6H2O	Fulvic acid	pre	0.278169	-15.7851	1.86415	-Fh/PC -ads. OC	0.155	50	7.75
11.4	70	10	FeCl3x6H2O	Fulvic acid	post	0.0369934	-21.1185	7.19753	raw	0.003255	50	0.16275
11.4	70	10	FeCl3x6H2O	Fulvic acid	post	0.0381123	-21.1293	7.20829	raw	0.003255	50	0.16275
11.4	70	10	FeCl3x6H2O	Fulvic acid	post	0.0376154	-21.2031	7.28207	raw	0.003255	50	0.16275
11.4	70	10	FeCl3x6H2O	Fulvic acid	post	0.0369856	-26.2791	12.3581	-Fh/PC	0.003255	50	0.16275
11.4	70	10	FeCl3x6H2O	Fulvic acid	post	0.0381011	-26.2009	12.2799	-Fh/PC	0.003255	50	0.16275
11.4	70	10	FeCl3x6H2O	Fulvic acid	post	0.0376005	-26.3287	12.4077	-Fh/PC	0.003255	50	0.16275
11.4	70	10	FeCl3x6H2O	Fulvic acid	post	0.0369578	-27.054	13.133	-Fh/PC -ads. OC	0.003255	50	0.16275
11.4	70	10	FeCl3x6H2O	Fulvic acid	post	0.0381126	-26.9716	13.0506	-Fh/PC -ads. OC	0.003255	50	0.16275
11.4	70	10	FeCl3x6H2O	Fulvic acid	post	0.0376317	-27.1012	13.1802	-Fh/PC -ads. OC	0.003255	50	0.16275
11.43	70	10	FeCl3x6H2O	Fulvic acid	post	0.05684	-21.2365	7.31551	raw	0.00501167	50	0.250583
11.43	70	10	FeCl3x6H2O	Fulvic acid	post	0.0586495	-21.7622	7.84119	raw	0.00501167	50	0.250583
11.43	70	10	FeCl3x6H2O	Fulvic acid	post	0.0579764	-20.8869	6.96588	raw	0.00501167	50	0.250583
11.43	70	10	FeCl3x6H2O	Fulvic acid	post	0.056972	-27.3181	13.3971	-Fh/PC -ads. OC	0.00501167	50	0.250583
11.43	70	10	FeCl3x6H2O	Fulvic acid	post	0.0586542	-27.4036	13.4826	-Fh/PC -ads. OC	0.00501167	50	0.250583
11.43	70	10	FeCl3x6H2O	Fulvic acid	post	0.0578588	-27.4846	13.5636	-Fh/PC -ads. OC	0.00501167	50	0.250583
11.43	70	10	FeCl3x6H2O	Fulvic acid	post	0.0571836	-27.9917	14.0707	-Fh/PC	0.00501167	50	0.250583
11.43	70	10	FeCl3x6H2O	Fulvic acid	post	0.0587242	-28.1044	14.1834	-Fh/PC	0.00501167	50	0.250583
11.43	70	10	FeCl3x6H2O	Fulvic acid	post	0.0578452	-28.0736	14.1526	-Fh/PC	0.00501167	50	0.250583
11.46	70	10	FeCl3x6H2O	Fulvic acid	post	0.243192	-23.0261	9.10513	raw	0.0193233	50	0.966167
11.46	70	10	FeCl3x6H2O	Fulvic acid	post	0.230384	-24.1117	10.1907	raw	0.0193233	50	0.966167
11.46	70	10	FeCl3x6H2O	Fulvic acid	post	0.230546	-23.0607	9.13966	raw	0.0193233	50	0.966167
11.46	70	10	FeCl3x6H2O	Fulvic acid	post	0.182783	-26.0794	12.1584	-Fh/PC -ads. OC	0.0193233	50	0.966167
11.46	70	10	FeCl3x6H2O	Fulvic acid	post	0.181542	-26.155	12.234	-Fh/PC -ads. OC	0.0193233	50	0.966167
11.46	70	10	FeCl3x6H2O	Fulvic acid	post	0.183191	-26.1881	12.2671	-Fh/PC -ads. OC	0.0193233	50	0.966167
11.46	70	10	FeCl3x6H2O	Fulvic acid	post	0.250706	-27.3854	13.4644	-Fh/PC	0.0193233	50	0.966167
11.46	70	10	FeCl3x6H2O	Fulvic acid	post	0.243051	-27.5362	13.6152	-Fh/PC	0.0193233	50	0.966167
11.46	70	10	FeCl3x6H2O	Fulvic acid	post	0.238837	-27.2042	13.2832	-Fh/PC	0.0193233	50	0.966167
11.4	70	10	FeCl3x6H2O	Fulvic acid	post	0.19178	-22.3932	8.47216	raw	0.0168433	50	0.842167
11.4	70	10	FeCl3x6H2O	Fulvic acid	post	0.204527	-21.1663	7.24533	raw	0.0168433	50	0.842167
11.4	70	10	FeCl3x6H2O	Fulvic acid	post	0.213838	-20.9039	6.98291	raw	0.0168433	50	0.842167
11.4	70	10	FeCl3x6H2O	Fulvic acid	post	0.158666	-25.9307	12.0097	-Fh/PC -ads. OC	0.0168433	50	0.842167
11.4	70	10	FeCl3x6H2O	Fulvic acid	post	0.162154	-25.9551	12.0341	-Fh/PC -ads. OC	0.0168433	50	0.842167
11.4	70	10	FeCl3x6H2O	Fulvic acid	post	0.160567	-25.8772	11.9562	-Fh/PC -ads. OC	0.0168433	50	0.842167
11.4	70	10	FeCl3x6H2O	Fulvic acid	post	0.130865	-27.5266	13.6056	-Fh/PC	0.0168433	50	0.842167
11.4	70	10	FeCl3x6H2O	Fulvic acid	post	0.133535	-27.5145	13.5935	-Fh/PC	0.0168433	50	0.842167
11.4	70	10	FeCl3x6H2O	Fulvic acid	post	0.130178	-27.5088	13.5878	-Fh/PC	0.0168433	50	0.842167
11.5	70	10	FeCl3x6H2O	Fulvic acid	post	0.310171	-17.5036	3.58256	raw	0.155	50	7.75
11.5	70	10	FeCl3x6H2O	Fulvic acid	post	0.294058	-16.7363	2.81533	raw	0.155	50	7.75
11.5	70	10	FeCl3x6H2O	Fulvic acid	post	0.294135	-16.7543	2.83335	raw	0.155	50	7.75
11.5	70	10	FeCl3x6H2O	Fulvic acid	post	0.271109	-18.8881	4.96713	-Fh/PC -ads. OC	0.155	50	7.75
11.5	70	10	FeCl3x6H2O	Fulvic acid	post	0.271348	-18.9738	5.05278	-Fh/PC -ads. OC	0.155	50	7.75
11.5	70	10	FeCl3x6H2O	Fulvic acid	post	0.27244	-18.9267	5.00572	-Fh/PC -ads. OC	0.155	50	7.75
11.5	70	10	FeCl3x6H2O	Fulvic acid	post	0.332723	-21.1819	7.2609	-Fh/PC	0.155	50	7.75
11.5	70	10	FeCl3x6H2O	Fulvic acid	post	0.343249	-21.364	7.44299	-Fh/PC	0.155	50	7.75
11.5	70	10	FeCl3x6H2O	Fulvic acid	post	0.339818	-21.3385	7.41748	-Fh/PC	0.155	50	7.75
11.5	70	10	FeCl3x6H2O	Fulvic acid	post	0.313992	-17.981	4.06004	raw	0.155	50	7.75
11.5	70	10	FeCl3x6H2O	Fulvic acid	post	0.336241	-18.7203	4.79927	raw	0.155	50	7.75
11.5	70	10	FeCl3x6H2O	Fulvic acid	post	0.319524	-18.17	4.24896	raw	0.155	50	7.75
11.5	70	10	FeCl3x6H2O	Fulvic acid	post	0.308165	-20.2675	6.34652	-Fh/PC -ads. OC	0.155	50	7.75
11.5	70	10	FeCl3x6H2O	Fulvic acid	post	0.314321	-20.4145	6.49353	-Fh/PC -ads. OC	0.155	50	7.75
11.5	70	10	FeCl3x6H2O	Fulvic acid	post	0.307733	-20.2637	6.34271	-Fh/PC -ads. OC	0.155	50	7.75
11.5	70	10	FeCl3x6H2O	Fulvic acid	post	0.381027	-22.4839	8.56289	-Fh/PC	0.155	50	7.75
11.5	70	10	FeCl3x6H2O	Fulvic acid	post	0.39038	-22.5752	8.65421	-Fh/PC	0.155	50	7.75
11.5	70	10	FeCl3x6H2O	Fulvic acid	post	0.379183	-22.3778	8.45682	-Fh/PC	0.155	50	7.75
11.5	4	14	FeCl3x6H2O	Fulvic acid	post	0.895754	-9.32895	-4.59205	raw	0.293689	24.9996	7.34211
11.5	4	14	FeCl3x6H2O	Fulvic acid	post	0.869623	-9.4871	-4.4339	raw	0.293689	24.9996	7.34211
11.5	4	14	FeCl3x6H2O	Fulvic acid	post	0.873834	-9.13089	-4.79011	raw	0.293689	24.9996	7.34211
11.5	4	14	FeCl3x6H2O	Fulvic acid	post	0.621223	-13.9721	0.0511472	-Fh/PC	0.293689	24.9996	7.34211
11.5	4	14	FeCl3x6H2O	Fulvic acid	post	0.642067	-13.9524	0.0314239	-Fh/PC	0.293689	24.9996	7.34211
11.5	4	14	FeCl3x6H2O	Fulvic acid	post	0.632755	-13.8366	-0.0843954	-Fh/PC	0.293689	24.9996	7.34211
11.5	4	14	FeCl3x6H2O	Fulvic acid	post	0.562034	-13.513	-0.407964	-Fh/PC -ads. OC	0.293689	24.9996	7.34211
11.5	4	14	FeCl3x6H2O	Fulvic acid	post	0.561475	-13.448	-0.472985	-Fh/PC -ads. OC	0.293689	24.9996	7.34211
11.5	4	14	FeCl3x6H2O	Fulvic acid	post	0.571765	-13.3487	-0.572281	-Fh/PC -ads. OC	0.293689	24.9996	7.34211
11.5	4	14	FeCl3x6H2O	Fulvic acid	post	0.834307	-9.45932	-4.46168	raw	0.293689	24.9996	7.34211
11.5	4	14	FeCl3x6H2O	Fulvic acid	post	0.842437	-9.47226	-4.44874	raw	0.293689	24.9996	7.34211
11.5	4	14	FeCl3x6H2O	Fulvic acid	post	0.837026	-9.47514	-4.44586	raw	0.293689	24.9996	7.34211
11.5	4	14	FeCl3x6H2O	Fulvic acid	post	0.551167	-13.8244	-0.0965688	-Fh/PC	0.293689	24.9996	7.34211
11.5	4	14	FeCl3x6H2O	Fulvic acid	post	0.545665	-13.9569	0.0359342	-Fh/PC	0.293689	24.9996	7.34211
11.5	4	14	FeCl3x6H2O	Fulvic acid	post	0.540783	-13.7636	-0.157421	-Fh/PC	0.293689	24.9996	7.34211
11.5	4	14	FeCl3x6H2O	Fulvic acid	post	0.535598	-13.3255	-0.595478	-Fh/PC -ads. OC	0.293689	24.9996	7.34211
11.5	4	14	FeCl3x6H2O	Fulvic acid	post	0.533546	-13.46	-0.461011	-Fh/PC -ads. OC	0.293689	24.9996	7.34211
11.5	4	14	FeCl3x6H2O	Fulvic acid	post	0.533925	-13.4738	-0.447197	-Fh/PC -ads. OC	0.293689	24.9996	7.34211
11.5	50	14	FeCl3x6H2O	Fulvic acid	post	0.708167	-14.409	0.488038	raw	0.293689	24.9996	7.34211
11.5	50	14	FeCl3x6H2O	Fulvic acid	post	0.729413	-14.7886	0.867582	raw	0.293689	24.9996	7.34211
11.5	50	14	FeCl3x6H2O	Fulvic acid	post	0.726359	-14.6788	0.757839	raw	0.293689	24.9996	7.34211
11.5	50	14	FeCl3x6H2O	Fulvic acid	post	0.484455	-14.8963	0.975274	-Fh/PC	0.293689	24.9996	7.34211
11.5	50	14	FeCl3x6H2O	Fulvic acid	post	0.49388	-14.9703	1.04933	-Fh/PC	0.293689	24.9996	7.34211
11.5	50	14	FeCl3x6H2O	Fulvic acid	post	0.493626	-15.1912	1.27017	-Fh/PC	0.293689	24.9996	7.34211
11.5	50	14	FeCl3x6H2O	Fulvic acid	post	0.476829	-14.3922	0.471176	-Fh/PC -ads. OC	0.293689	24.9996	7.34211
11.5	50	14	FeCl3x6H2O	Fulvic acid	post	0.484638	-14.5527	0.631723	-Fh/PC -ads. OC	0.293689	24.9996	7.34211
11.5	50	14	FeCl3x6H2O	Fulvic acid	post	0.484704	-14.5698	0.648797	-Fh/PC -ads. OC	0.293689	24.9996	7.34211
11.5	50	14	FeCl3x6H2O	Fulvic acid	post	0.601822	-12.92	-1.00101	raw	0.293689	24.9996	7.34211
11.5	50	14	FeCl3x6H2O	Fulvic acid	post	0.623935	-13.2472	-0.673805	raw	0.293689	24.9996	7.34211
11.5	50	14	FeCl3x6H2O	Fulvic acid	post	0.631603	-13.3758	-0.545216	raw	0.293689	24.9996	7.34211
11.5	50	14	FeCl3x6H2O	Fulvic acid	post	0.542538	-15.5292	1.60823	-Fh/PC	0.293689	24.9996	7.34211
11.5	50	14	FeCl3x6H2O	Fulvic acid	post	0.539967	-15.2753	1.3543	-Fh/PC	0.293689	24.9996	7.34211
11.5	50	14	FeCl3x6H2O	Fulvic acid	post	0.534133	-15.4902	1.56921	-Fh/PC	0.293689	24.9996	7.34211
11.5	50	14	FeCl3x6H2O	Fulvic acid	post	0.492697	-15.016	1.09504	-Fh/PC -ads. OC	0.293689	24.9996	7.34211
11.5	50	14	FeCl3x6H2O	Fulvic acid	post	0.489407	-14.8378	0.916823	-Fh/PC -ads. OC	0.293689	24.9996	7.34211
11.5	50	14	FeCl3x6H2O	Fulvic acid	post	0.491124	-14.9167	0.995661	-Fh/PC -ads. OC	0.293689	24.9996	7.34211
11.5	95	14	FeCl3x6H2O	Fulvic acid	post	0.838649	-23.1908	9.26985	raw	0.293689	24.9996	7.34211
11.5	95	14	FeCl3x6H2O	Fulvic acid	post	0.847218	-23.0988	9.17785	raw	0.293689	24.9996	7.34211
11.5	95	14	FeCl3x6H2O	Fulvic acid	post	0.849836	-23.1815	9.26052	raw	0.293689	24.9996	7.34211
11.5	95	14	FeCl3x6H2O	Fulvic acid	post	0.615926	-22.9693	9.04825	-Fh/PC	0.293689	24.9996	7.34211
11.5	95	14	FeCl3x6H2O	Fulvic acid	post	0.618435	-22.9241	9.00308	-Fh/PC	0.293689	24.9996	7.34211
11.5	95	14	FeCl3x6H2O	Fulvic acid	post	0.612363	-22.9218	9.00075	-Fh/PC	0.293689	24.9996	7.34211
11.5	95	14	FeCl3x6H2O	Fulvic acid	post	0.534201	-22.7615	8.84048	-Fh/PC -ads. OC	0.293689	24.9996	7.34211
11.5	95	14	FeCl3x6H2O	Fulvic acid	post	0.530795	-22.8174	8.89642	-Fh/PC -ads. OC	0.293689	24.9996	7.34211
11.5	95	14	FeCl3x6H2O	Fulvic acid	post	0.532747	-22.7952	8.87422	-Fh/PC -ads. OC	0.293689	24.9996	7.34211
11.5	95	14	FeCl3x6H2O	Fulvic acid	post	0.690162	-21.9514	8.03044	raw	0.391585	24.9996	9.78947
11.5	95	14	FeCl3x6H2O	Fulvic acid	post	0.73173	-22.0707	8.1497	raw	0.391585	24.9996	9.78947
11.5	95	14	FeCl3x6H2O	Fulvic acid	post	0.695506	-21.831	7.90998	raw	0.391585	24.9996	9.78947
11.5	95	14	FeCl3x6H2O	Fulvic acid	post	0.801682	-22.7791	8.85807	-Fh/PC	0.391585	24.9996	9.78947
11.5	95	14	FeCl3x6H2O	Fulvic acid	post	0.777891	-22.7928	8.87178	-Fh/PC	0.391585	24.9996	9.78947
11.5	95	14	FeCl3x6H2O	Fulvic acid	post	0.783865	-22.79	8.869	-Fh/PC	0.391585	24.9996	9.78947
11.5	95	14	FeCl3x6H2O	Fulvic acid	post	0.721554	-22.5716	8.65063	-Fh/PC -ads. OC	0.391585	24.9996	9.78947
11.5	95	14	FeCl3x6H2O	Fulvic acid	post	0.738522	-22.7606	8.83961	-Fh/PC -ads. OC	0.391585	24.9996	9.78947
11.5	95	14	FeCl3x6H2O	Fulvic acid	post	0.732444	-22.8333	8.91233	-Fh/PC -ads. OC	0.391585	24.9996	9.78947
11.5	70	7	Fe(NO3)3x9H2O	Fulvic acid	post	0.036985	-25.9898	12.0688	-Fh/PC -ads. OC	0.003255	50	0.16275
11.5	70	7	Fe(NO3)3x9H2O	Fulvic acid	post	0.0381083	-26.0403	12.1193	-Fh/PC -ads. OC	0.003255	50	0.16275
11.5	70	7	Fe(NO3)3x9H2O	Fulvic acid	post	0.0375897	-26.029	12.108	-Fh/PC -ads. OC	0.003255	50	0.16275
11.5	70	7	Fe(NO3)3x9H2O	Fulvic acid	post	0.0287537	-25.7386	11.8176	-Fh/PC -ads. OC	0.00253167	50	0.126583
11.5	70	7	Fe(NO3)3x9H2O	Fulvic acid	post	0.0296552	-25.9011	11.9801	-Fh/PC -ads. OC	0.00253167	50	0.126583
11.5	70	7	Fe(NO3)3x9H2O	Fulvic acid	post	0.029253	-25.8864	11.9654	-Fh/PC -ads. OC	0.00253167	50	0.126583
11.5	70	7	Fe(NO3)3x9H2O	Fulvic acid	post	0.216632	-25.4277	11.5067	-Fh/PC -ads. OC	0.017825	50	0.89125
11.5	70	7	Fe(NO3)3x9H2O	Fulvic acid	post	0.218085	-25.4523	11.5313	-Fh/PC -ads. OC	0.017825	50	0.89125
11.5	70	7	Fe(NO3)3x9H2O	Fulvic acid	post	0.221566	-25.408	11.487	-Fh/PC -ads. OC	0.017825	50	0.89125
11.5	70	7	Fe(NO3)3x9H2O	Fulvic acid	post	0.234902	-25.1142	11.1932	-Fh/PC -ads. OC	0.0190133	50	0.950667
11.5	70	7	Fe(NO3)3x9H2O	Fulvic acid	post	0.236939	-25.2357	11.3147	-Fh/PC -ads. OC	0.0190133	50	0.950667
11.5	70	7	Fe(NO3)3x9H2O	Fulvic acid	post	0.235562	-25.2398	11.3188	-Fh/PC -ads. OC	0.0190133	50	0.950667
11.5	70	7	Fe(NO3)3x9H2O	Fulvic acid	post	0.350379	-20.1919	6.27091	-Fh/PC -ads. OC	0.154122	50	7.70608
11.5	70	7	Fe(NO3)3x9H2O	Fulvic acid	post	0.347511	-20.1856	6.26463	-Fh/PC -ads. OC	0.154122	50	7.70608
11.5	70	7	Fe(NO3)3x9H2O	Fulvic acid	post	0.346588	-20.1764	6.25538	-Fh/PC -ads. OC	0.154122	50	7.70608
11.5	70	7	Fe(NO3)3x9H2O	Fulvic acid	post	0.383969	-21.3558	7.43482	-Fh/PC -ads. OC	0.156808	50	7.84042
11.5	70	7	Fe(NO3)3x9H2O	Fulvic acid	post	0.385613	-21.3436	7.42264	-Fh/PC -ads. OC	0.156808	50	7.84042
11.5	70	7	Fe(NO3)3x9H2O	Fulvic acid	post	0.383533	-21.4939	7.57293	-Fh/PC -ads. OC	0.156808	50	7.84042
1.8	50	5	Fe(NO3)3x9H2O	Fulvic acid	post	0.00496957	-25.7387	11.8177	-Fh/PC -ads. OC	0.000567932	333.569	0.189444
1.8	50	5	Fe(NO3)3x9H2O	Fulvic acid	post	0.00584203	-25.7924	11.8714	-Fh/PC -ads. OC	0.000567932	333.569	0.189444
1.8	50	5	Fe(NO3)3x9H2O	Fulvic acid	post	0.00858815	-22.3541	8.43311	-Fh/PC -ads. OC	0.000567932	333.569	0.189444
1.8	50	5	Fe(NO3)3x9H2O	Fulvic acid	post	0.00705079	-23.0958	9.17477	-Fh/PC -ads. OC	0.000567932	333.569	0.189444
1.8	50	5	Fe(NO3)3x9H2O	Fulvic acid	post	0.00426739	-26.3578	12.4368	-Fh/PC	0.000567932	333.569	0.189444
1.8	50	5	Fe(NO3)3x9H2O	Fulvic acid	post	0.00390093	-26.5984	12.6774	-Fh/PC	0.000567932	333.569	0.189444
1.8	50	5	Fe(NO3)3x9H2O	Fulvic acid	post	0.0070725	-23.9889	10.0679	-Fh/PC	0.000567932	333.569	0.189444
1.8	50	5	Fe(NO3)3x9H2O	Fulvic acid	post	0.00713131	-24.0915	10.1705	-Fh/PC	0.000567932	333.569	0.189444
1.8	50	5	Fe(NO3)3x9H2O	Fulvic acid	post	0.00605542	-23.6313	9.71026	raw	0.000567932	333.569	0.189444
1.8	50	5	Fe(NO3)3x9H2O	Fulvic acid	post	0.00674738	-24.5286	10.6076	raw	0.000567932	333.569	0.189444
1.8	50	5	Fe(NO3)3x9H2O	Fulvic acid	post	0.00949213	-26.8554	12.9344	raw	0.000567932	333.569	0.189444
1.8	50	5	Fe(NO3)3x9H2O	Fulvic acid	post	0.00915994	-26.9144	12.9934	raw	0.000567932	333.569	0.189444
1.8	50	5	Fe(NO3)3x9H2O	Fulvic acid	post	0.00257868	-26.5889	12.6679	-Fh/PC -ads. OC	0.000371737	333.569	0.124
1.8	50	5	Fe(NO3)3x9H2O	Fulvic acid	post	0.00260024	-26.3996	12.4786	-Fh/PC -ads. OC	0.000371737	333.569	0.124
1.8	50	5	Fe(NO3)3x9H2O	Fulvic acid	post	0.00257234	-26.5827	12.6617	-Fh/PC -ads. OC	0.000371737	333.569	0.124
1.8	50	5	Fe(NO3)3x9H2O	Fulvic acid	post	0.00209118	-25.1666	11.2456	-Fh/PC	0.000371737	333.569	0.124
1.8	50	5	Fe(NO3)3x9H2O	Fulvic acid	post	0.00179941	-24.9867	11.0657	-Fh/PC	0.000371737	333.569	0.124
1.8	50	5	Fe(NO3)3x9H2O	Fulvic acid	post	0.00213534	-25.0185	11.0975	-Fh/PC	0.000371737	333.569	0.124
1.8	50	5	Fe(NO3)3x9H2O	Fulvic acid	post	0.00458573	-26.4815	12.5605	raw	0.000371737	333.569	0.124
1.8	50	5	Fe(NO3)3x9H2O	Fulvic acid	post	0.0047282	-26.478	12.557	raw	0.000371737	333.569	0.124
1.8	50	5	Fe(NO3)3x9H2O	Fulvic acid	post	0.00491243	-26.0904	12.1694	raw	0.000371737	333.569	0.124
1.8	50	5	Fe(NO3)3x9H2O	Fulvic acid	post	0.0366925	-14.3119	0.390891	-Fh/PC -ads. OC	0.0040478	333.569	1.35022
1.8	50	5	Fe(NO3)3x9H2O	Fulvic acid	post	0.0362455	-13.3612	-0.559805	-Fh/PC -ads. OC	0.0040478	333.569	1.35022
1.8	50	5	Fe(NO3)3x9H2O	Fulvic acid	post	0.0374671	-13.9057	-0.0152551	-Fh/PC -ads. OC	0.0040478	333.569	1.35022
1.8	50	5	Fe(NO3)3x9H2O	Fulvic acid	post	0.0521524	-16.0264	2.10536	-Fh/PC	0.0040478	333.569	1.35022
1.8	50	5	Fe(NO3)3x9H2O	Fulvic acid	post	0.0549887	-17.7069	3.78592	-Fh/PC	0.0040478	333.569	1.35022
1.8	50	5	Fe(NO3)3x9H2O	Fulvic acid	post	0.0501058	-16.5136	2.59264	-Fh/PC	0.0040478	333.569	1.35022
1.8	50	5	Fe(NO3)3x9H2O	Fulvic acid	post	0.0645974	-19.3147	5.39375	raw	0.0040478	333.569	1.35022
1.8	50	5	Fe(NO3)3x9H2O	Fulvic acid	post	0.0626229	-19.0423	5.12135	raw	0.0040478	333.569	1.35022
1.8	50	5	Fe(NO3)3x9H2O	Fulvic acid	post	0.0641618	-19.3776	5.4566	raw	0.0040478	333.569	1.35022
1.8	50	5	Fe(NO3)3x9H2O	Fulvic acid	post	0.0565968	-15.5054	1.58444	-Fh/PC -ads. OC	0.00528693	333.569	1.76356
1.8	50	5	Fe(NO3)3x9H2O	Fulvic acid	post	0.0571035	-15.492	1.57103	-Fh/PC -ads. OC	0.00528693	333.569	1.76356
1.8	50	5	Fe(NO3)3x9H2O	Fulvic acid	post	0.0562652	-15.0129	1.09192	-Fh/PC -ads. OC	0.00528693	333.569	1.76356
1.8	50	5	Fe(NO3)3x9H2O	Fulvic acid	post	0.0582728	-15.8488	1.92783	-Fh/PC	0.00528693	333.569	1.76356
1.8	50	5	Fe(NO3)3x9H2O	Fulvic acid	post	0.0600536	-15.6368	1.71584	-Fh/PC	0.00528693	333.569	1.76356
1.8	50	5	Fe(NO3)3x9H2O	Fulvic acid	post	0.0591736	-15.9268	2.00581	-Fh/PC	0.00528693	333.569	1.76356
1.8	50	5	Fe(NO3)3x9H2O	Fulvic acid	post	0.0737971	-18.1815	4.26046	raw	0.00528693	333.569	1.76356
1.8	50	5	Fe(NO3)3x9H2O	Fulvic acid	post	0.0607527	-16.1097	2.18869	raw	0.00528693	333.569	1.76356
1.8	50	5	Fe(NO3)3x9H2O	Fulvic acid	post	0.0631655	-16.4659	2.54488	raw	0.00528693	333.569	1.76356
1.8	50	5	Fe(NO3)3x9H2O	Fulvic acid	post	0.364572	-13.5962	-0.324798	-Fh/PC -ads. OC	0.0304824	333.569	10.168
1.8	50	5	Fe(NO3)3x9H2O	Fulvic acid	post	0.307345	-12.917	-1.00401	-Fh/PC -ads. OC	0.0304824	333.569	10.168
1.8	50	5	Fe(NO3)3x9H2O	Fulvic acid	post	0.344462	-12.7834	-1.13759	-Fh/PC -ads. OC	0.0304824	333.569	10.168
1.8	50	5	Fe(NO3)3x9H2O	Fulvic acid	post	0.335634	-12.7055	-1.21552	-Fh/PC	0.0304824	333.569	10.168
1.8	50	5	Fe(NO3)3x9H2O	Fulvic acid	post	0.334783	-12.7904	-1.13057	-Fh/PC	0.0304824	333.569	10.168
1.8	50	5	Fe(NO3)3x9H2O	Fulvic acid	post	0.338605	-12.794	-1.12704	-Fh/PC	0.0304824	333.569	10.168
1.8	50	5	Fe(NO3)3x9H2O	Fulvic acid	post	0.34788	-12.7593	-1.16166	-Fh/PC	0.0304824	333.569	10.168
1.8	50	5	Fe(NO3)3x9H2O	Fulvic acid	post	0.29438	-11.7614	-2.15959	raw	0.0304824	333.569	10.168
1.8	50	5	Fe(NO3)3x9H2O	Fulvic acid	post	0.293096	-11.7289	-2.19206	raw	0.0304824	333.569	10.168
1.8	50	5	Fe(NO3)3x9H2O	Fulvic acid	post	0.294639	-11.7874	-2.13355	raw	0.0304824	333.569	10.168
1.8	50	5	Fe(NO3)3x9H2O	Fulvic acid	post	0.360708	-13.0429	-0.878131	-Fh/PC -ads. OC	0.0314324	333.569	10.4849
1.8	50	5	Fe(NO3)3x9H2O	Fulvic acid	post	0.360983	-13.2132	-0.707787	-Fh/PC -ads. OC	0.0314324	333.569	10.4849
1.8	50	5	Fe(NO3)3x9H2O	Fulvic acid	post	0.366444	-13.2804	-0.640572	-Fh/PC -ads. OC	0.0314324	333.569	10.4849
1.8	50	5	Fe(NO3)3x9H2O	Fulvic acid	post	0.388871	-14.1153	0.194252	-Fh/PC	0.0314324	333.569	10.4849
1.8	50	5	Fe(NO3)3x9H2O	Fulvic acid	post	0.379107	-13.8057	-0.115277	-Fh/PC	0.0314324	333.569	10.4849
1.8	50	5	Fe(NO3)3x9H2O	Fulvic acid	post	0.381613	-13.8526	-0.0684015	-Fh/PC	0.0314324	333.569	10.4849
1.8	50	5	Fe(NO3)3x9H2O	Fulvic acid	post	0.34804	-12.6596	-1.26143	raw	0.0314324	333.569	10.4849
1.8	50	5	Fe(NO3)3x9H2O	Fulvic acid	post	0.344632	-12.6254	-1.29564	raw	0.0314324	333.569	10.4849
1.8	50	5	Fe(NO3)3x9H2O	Fulvic acid	post	0.343885	-12.608	-1.31299	raw	0.0314324	333.569	10.4849
5	25	10	FeCl3x6H2O	Fulvic acid	post	0.0100578	-25.4369	11.5159	-Fh/PC -ads. OC	0.00078275	198.02	0.155
5	25	10	FeCl3x6H2O	Fulvic acid	post	0.0104072	-25.545	11.624	-Fh/PC -ads. OC	0.00078275	198.02	0.155
5	25	10	FeCl3x6H2O	Fulvic acid	post	0.0110709	-25.4614	11.5404	-Fh/PC -ads. OC	0.00078275	198.02	0.155
6	25	10	FeCl3x6H2O	Fulvic acid	post	0.120705	-22.753	8.832	-Fh/PC -ads. OC	0.0078275	198.02	1.55
6	25	10	FeCl3x6H2O	Fulvic acid	post	0.109704	-21.8859	7.96492	-Fh/PC -ads. OC	0.0078275	198.02	1.55
6	25	10	FeCl3x6H2O	Fulvic acid	post	0.116341	-22.2298	8.30883	-Fh/PC -ads. OC	0.0078275	198.02	1.55
6	25	10	FeCl3x6H2O	Fulvic acid	post	0.388596	-15.2037	1.2827	-Fh/PC -ads. OC	0.078275	198.02	15.5
6	25	10	FeCl3x6H2O	Fulvic acid	post	0.400239	-14.965	1.044	-Fh/PC -ads. OC	0.078275	198.02	15.5
6	25	10	FeCl3x6H2O	Fulvic acid	post	0.400173	-14.883	0.962028	-Fh/PC -ads. OC	0.078275	198.02	15.5
5	25	10	FeCl3x6H2O	Fulvic acid	post	1.62927	-13.9484	0.0274103	-Fh/PC -ads. OC	0.3131	49.505	15.5
5	25	10	FeCl3x6H2O	Fulvic acid	post	1.6137	-14.0576	0.136587	-Fh/PC -ads. OC	0.3131	49.505	15.5
5	25	10	FeCl3x6H2O	Fulvic acid	post	1.62332	-14.0332	0.112209	-Fh/PC -ads. OC	0.3131	49.505	15.5
6	25	10	FeCl3x6H2O	Fulvic acid	post	1.27303	-13.974	0.0529687	-Fh/PC -ads. OC	0.15655	99.0099	15.5
6	25	10	FeCl3x6H2O	Fulvic acid	post	1.27271	-14.0118	0.0908367	-Fh/PC -ads. OC	0.15655	99.0099	15.5
6	25	10	FeCl3x6H2O	Fulvic acid	post	1.15464	-13.892	-0.0289624	-Fh/PC -ads. OC	0.15655	99.0099	15.5
6	25	10	FeCl3x6H2O	Fulvic acid	post	0.264597	-14.8583	0.9373	-Fh/PC -ads. OC	0.0391375	396.04	15.5
6	25	10	FeCl3x6H2O	Fulvic acid	post	0.270162	-14.938	1.01697	-Fh/PC -ads. OC	0.0391375	396.04	15.5
6	25	10	FeCl3x6H2O	Fulvic acid	post	0.261979	-14.7465	0.825532	-Fh/PC -ads. OC	0.0391375	396.04	15.5
6	25	14	FeCl3x6H2O	Fulvic acid	post	0.00961129	-22.4361	8.51515	-Fh/PC -ads. OC	0.00130458	198.02	0.258333
6	25	14	FeCl3x6H2O	Fulvic acid	post	0.0100782	-22.2395	8.3185	-Fh/PC -ads. OC	0.00130458	198.02	0.258333
6	25	14	FeCl3x6H2O	Fulvic acid	post	0.0108977	-22.4222	8.50122	-Fh/PC -ads. OC	0.00130458	198.02	0.258333
6	25	14	FeCl3x6H2O	Fulvic acid	post	0.125953	-19.123	5.20198	-Fh/PC -ads. OC	0.0078275	198.02	1.55
6	25	14	FeCl3x6H2O	Fulvic acid	post	0.12722	-19.1816	5.26056	-Fh/PC -ads. OC	0.0078275	198.02	1.55
6	25	14	FeCl3x6H2O	Fulvic acid	post	0.126288	-19.0124	5.0914	-Fh/PC -ads. OC	0.0078275	198.02	1.55
6	25	14	FeCl3x6H2O	Fulvic acid	post	0.578527	-14.5008	0.57981	-Fh/PC -ads. OC	0.078275	198.02	15.5
6	25	14	FeCl3x6H2O	Fulvic acid	post	0.573964	-14.4599	0.538944	-Fh/PC -ads. OC	0.078275	198.02	15.5
6	25	14	FeCl3x6H2O	Fulvic acid	post	0.574342	-14.4867	0.565664	-Fh/PC -ads. OC	0.078275	198.02	15.5
7	25	120	FeCl3x6H2O	Fulvic acid	post	0.0175506	-27.0258	13.1048	raw	0.00117413	99.0099	0.11625
7	25	120	FeCl3x6H2O	Fulvic acid	post	0.0153911	-26.8699	12.9489	raw	0.00117413	99.0099	0.11625
7	25	120	FeCl3x6H2O	Fulvic acid	post	0.0164849	-27.1382	13.2172	raw	0.00117413	99.0099	0.11625
7	25	120	FeCl3x6H2O	Fulvic acid	post	0.0123509	-26.159	12.238	-Fh/PC	0.00117413	99.0099	0.11625
7	25	120	FeCl3x6H2O	Fulvic acid	post	0.0120142	-26.3951	12.4741	-Fh/PC	0.00117413	99.0099	0.11625
7	25	120	FeCl3x6H2O	Fulvic acid	post	0.0120979	-26.4617	12.5407	-Fh/PC	0.00117413	99.0099	0.11625
7	25	120	FeCl3x6H2O	Fulvic acid	post	0.00490382	-23.6514	9.73036	-Fh/PC -ads. OC	0.00117413	99.0099	0.11625
7	25	120	FeCl3x6H2O	Fulvic acid	post	0.00471923	-23.4233	9.50231	-Fh/PC -ads. OC	0.00117413	99.0099	0.11625
7	25	120	FeCl3x6H2O	Fulvic acid	post	0.00463151	-23.1347	9.21367	-Fh/PC -ads. OC	0.00117413	99.0099	0.11625
7	25	120	FeCl3x6H2O	Fulvic acid	post	0.00681078	-27.6105	13.6895	raw	0.00117413	99.0099	0.11625
7	25	120	FeCl3x6H2O	Fulvic acid	post	0.00779778	-27.5802	13.6592	raw	0.00117413	99.0099	0.11625
7	25	120	FeCl3x6H2O	Fulvic acid	post	0.00945585	-27.5557	13.6347	raw	0.00117413	99.0099	0.11625
7	25	120	FeCl3x6H2O	Fulvic acid	post	0.0110611	-25.653	11.732	-Fh/PC	0.00117413	99.0099	0.11625
7	25	120	FeCl3x6H2O	Fulvic acid	post	0.010514	-25.632	11.711	-Fh/PC	0.00117413	99.0099	0.11625
7	25	120	FeCl3x6H2O	Fulvic acid	post	0.0112557	-25.532	11.611	-Fh/PC	0.00117413	99.0099	0.11625
7	25	120	FeCl3x6H2O	Fulvic acid	post	0.00568507	-24.1133	10.1923	-Fh/PC -ads. OC	0.00117413	99.0099	0.11625
7	25	120	FeCl3x6H2O	Fulvic acid	post	0.00571986	-24.0722	10.1512	-Fh/PC -ads. OC	0.00117413	99.0099	0.11625
7	25	120	FeCl3x6H2O	Fulvic acid	post	0.00577653	-24.2948	10.3738	-Fh/PC -ads. OC	0.00117413	99.0099	0.11625
7	25	120	FeCl3x6H2O	Fulvic acid	post	0.062052	-26.1821	12.2611	raw	0.00391375	99.0099	0.3875
7	25	120	FeCl3x6H2O	Fulvic acid	post	0.0605838	-25.9859	12.0649	raw	0.00391375	99.0099	0.3875
7	25	120	FeCl3x6H2O	Fulvic acid	post	0.0606274	-26.0009	12.0799	raw	0.00391375	99.0099	0.3875
7	25	120	FeCl3x6H2O	Fulvic acid	post	0.0394637	-24.4195	10.4985	-Fh/PC	0.00391375	99.0099	0.3875
7	25	120	FeCl3x6H2O	Fulvic acid	post	0.0429557	-24.7285	10.8075	-Fh/PC	0.00391375	99.0099	0.3875
7	25	120	FeCl3x6H2O	Fulvic acid	post	0.0422501	-24.6744	10.7534	-Fh/PC	0.00391375	99.0099	0.3875
7	25	120	FeCl3x6H2O	Fulvic acid	post	0.0207541	-22.2027	8.2817	-Fh/PC -ads. OC	0.00391375	99.0099	0.3875
7	25	120	FeCl3x6H2O	Fulvic acid	post	0.0218885	-22.5617	8.6407	-Fh/PC -ads. OC	0.00391375	99.0099	0.3875
7	25	120	FeCl3x6H2O	Fulvic acid	post	0.0221745	-22.5434	8.62236	-Fh/PC -ads. OC	0.00391375	99.0099	0.3875
7	25	120	FeCl3x6H2O	Fulvic acid	post	0.0534051	-25.4417	11.5207	raw	0.00391375	99.0099	0.3875
7	25	120	FeCl3x6H2O	Fulvic acid	post	0.0563022	-25.6382	11.7172	raw	0.00391375	99.0099	0.3875
7	25	120	FeCl3x6H2O	Fulvic acid	post	0.0571941	-25.8092	11.8882	raw	0.00391375	99.0099	0.3875
7	25	120	FeCl3x6H2O	Fulvic acid	post	0.00430505	-24.2279	10.3069	-Fh/PC	0.00391375	99.0099	0.3875
7	25	120	FeCl3x6H2O	Fulvic acid	post	0.0377366	-24.0179	10.0969	-Fh/PC	0.00391375	99.0099	0.3875
7	25	120	FeCl3x6H2O	Fulvic acid	post	0.0393326	-24.1831	10.2621	-Fh/PC	0.00391375	99.0099	0.3875
7	25	120	FeCl3x6H2O	Fulvic acid	post	0.0218126	-22.9413	9.02027	-Fh/PC -ads. OC	0.00391375	99.0099	0.3875
7	25	120	FeCl3x6H2O	Fulvic acid	post	0.0200589	-21.7637	7.84269	-Fh/PC -ads. OC	0.00391375	99.0099	0.3875
7	25	120	FeCl3x6H2O	Fulvic acid	post	0.022033	-23.1	9.179	-Fh/PC -ads. OC	0.00391375	99.0099	0.3875
7	25	120	FeCl3x6H2O	Fulvic acid	post	0.445723	-21.2159	7.2949	raw	0.0391375	99.0099	3.875
7	25	120	FeCl3x6H2O	Fulvic acid	post	0.457909	-21.4695	7.54849	raw	0.0391375	99.0099	3.875
7	25	120	FeCl3x6H2O	Fulvic acid	post	0.461581	-21.5759	7.6549	raw	0.0391375	99.0099	3.875
7	25	120	FeCl3x6H2O	Fulvic acid	post	0.250868	-18.2393	4.31833	raw	0.0391375	99.0099	3.875
7	25	120	FeCl3x6H2O	Fulvic acid	post	0.274883	-18.8017	4.88074	-Fh/PC	0.0391375	99.0099	3.875
7	25	120	FeCl3x6H2O	Fulvic acid	post	0.302987	-18.8727	4.95171	-Fh/PC	0.0391375	99.0099	3.875
7	25	120	FeCl3x6H2O	Fulvic acid	post	0.223889	-16.3189	2.39788	-Fh/PC	0.0391375	99.0099	3.875
7	25	120	FeCl3x6H2O	Fulvic acid	post	0.226676	-16.4556	2.53459	-Fh/PC -ads. OC	0.0391375	99.0099	3.875
7	25	120	FeCl3x6H2O	Fulvic acid	post	0.225441	-16.5762	2.6552	-Fh/PC -ads. OC	0.0391375	99.0099	3.875
7	25	120	FeCl3x6H2O	Fulvic acid	post	0.387082	-20.27	6.34897	raw	0.0391375	99.0099	3.875
7	25	120	FeCl3x6H2O	Fulvic acid	post	0.405535	-20.2196	6.29865	raw	0.0391375	99.0099	3.875
7	25	120	FeCl3x6H2O	Fulvic acid	post	0.359642	-20.3639	6.44285	raw	0.0391375	99.0099	3.875
7	25	120	FeCl3x6H2O	Fulvic acid	post	0.270465	-19.4272	5.50624	-Fh/PC	0.0391375	99.0099	3.875
7	25	120	FeCl3x6H2O	Fulvic acid	post	0.290125	-19.3789	5.45791	-Fh/PC	0.0391375	99.0099	3.875
7	25	120	FeCl3x6H2O	Fulvic acid	post	0.301288	-19.2858	5.36478	-Fh/PC	0.0391375	99.0099	3.875
7	25	120	FeCl3x6H2O	Fulvic acid	post	0.22394	-16.7477	2.8267	-Fh/PC -ads. OC	0.0391375	99.0099	3.875
7	25	120	FeCl3x6H2O	Fulvic acid	post	0.223092	-16.9113	2.99029	-Fh/PC -ads. OC	0.0391375	99.0099	3.875
7	25	120	FeCl3x6H2O	Fulvic acid	post	0.260783	-16.9057	2.98473	-Fh/PC -ads. OC	0.0391375	99.0099	3.875
5	25	10	FeCl3x6H2O	M-DOC	post	0.0062977	-25.7814	8.35745	-Fh/PC -ads. OC	0.0004545	198.02	0.09
5	25	10	FeCl3x6H2O	M-DOC	post	0.00617792	-25.9329	8.5089	-Fh/PC -ads. OC	0.0004545	198.02	0.09
5	25	10	FeCl3x6H2O	M-DOC	post	0.00624023	-25.9757	8.55173	-Fh/PC -ads. OC	0.0004545	198.02	0.09
6	25	10	FeCl3x6H2O	M-DOC	post	0.0576575	-24.169	6.74502	-Fh/PC -ads. OC	0.004545	198.02	0.9
6	25	10	FeCl3x6H2O	M-DOC	post	0.0560849	-24.1014	6.67736	-Fh/PC -ads. OC	0.004545	198.02	0.9
6	25	10	FeCl3x6H2O	M-DOC	post	0.0579434	-24.3957	6.9717	-Fh/PC -ads. OC	0.004545	198.02	0.9
6	25	10	FeCl3x6H2O	M-DOC	post	0.258424	-18.2362	0.812231	-Fh/PC -ads. OC	0.04545	198.02	9
6	25	10	FeCl3x6H2O	M-DOC	post	0.254379	-18.4511	1.02708	-Fh/PC -ads. OC	0.04545	198.02	9
6	25	10	FeCl3x6H2O	M-DOC	post	0.259424	-18.4538	1.02975	-Fh/PC -ads. OC	0.04545	198.02	9
6	25	10	FeCl3x6H2O	M-DOC	post	0.902155	-17.3646	-0.0593701	-Fh/PC -ads. OC	0.1818	49.505	9
6	25	10	FeCl3x6H2O	M-DOC	post	0.90361	-17.3123	-0.1117	-Fh/PC -ads. OC	0.1818	49.505	9
6	25	10	FeCl3x6H2O	M-DOC	post	0.919503	-17.2613	-0.162676	-Fh/PC -ads. OC	0.1818	49.505	9
6	25	10	FeCl3x6H2O	M-DOC	post	0.461503	-17.3472	-0.0768306	-Fh/PC -ads. OC	0.0909	99.0099	9
6	25	10	FeCl3x6H2O	M-DOC	post	0.464321	-17.3054	-0.118618	-Fh/PC -ads. OC	0.0909	99.0099	9
6	25	10	FeCl3x6H2O	M-DOC	post	0.456661	-17.3061	-0.117917	-Fh/PC -ads. OC	0.0909	99.0099	9
6	25	10	FeCl3x6H2O	M-DOC	post	0.143672	-18.0447	0.620742	-Fh/PC -ads. OC	0.022725	396.04	9
6	25	10	FeCl3x6H2O	M-DOC	post	0.141922	-18.064	0.639973	-Fh/PC -ads. OC	0.022725	396.04	9
6	25	10	FeCl3x6H2O	M-DOC	post	0.144097	-18.4182	0.994178	-Fh/PC -ads. OC	0.022725	396.04	9
6	25	14	FeCl3x6H2O	M-DOC	post	0.0103789	-22.2662	4.84224	-Fh/PC -ads. OC	0.0007575	198.02	0.15
6	25	14	FeCl3x6H2O	M-DOC	post	0.0100937	-22.2459	4.82194	-Fh/PC -ads. OC	0.0007575	198.02	0.15
6	25	14	FeCl3x6H2O	M-DOC	post	0.0121223	-23.5632	6.13921	-Fh/PC -ads. OC	0.0007575	198.02	0.15
6	25	14	FeCl3x6H2O	M-DOC	post	0.038061	-20.1002	2.67617	-Fh/PC -ads. OC	0.004545	198.02	0.9
6	25	14	FeCl3x6H2O	M-DOC	post	0.0369988	-19.8802	2.45622	-Fh/PC -ads. OC	0.004545	198.02	0.9
6	25	14	FeCl3x6H2O	M-DOC	post	0.0353832	-19.8578	2.43376	-Fh/PC -ads. OC	0.004545	198.02	0.9
6	25	14	FeCl3x6H2O	M-DOC	post	0.338637	-17.5524	0.128397	-Fh/PC -ads. OC	0.04545	198.02	9
6	25	14	FeCl3x6H2O	M-DOC	post	0.334778	-17.4377	0.0137084	-Fh/PC -ads. OC	0.04545	198.02	9
6	25	14	FeCl3x6H2O	M-DOC	post	0.340615	-17.5314	0.107376	-Fh/PC -ads. OC	0.04545	198.02	9
6	25	10	FeCl3x6H2O	C-DOC	post	0.506355	-25.422	-0.51501	-Fh/PC -ads. OC	0.17675	99.0099	17.5
6	25	10	FeCl3x6H2O	C-DOC	post	0.493115	-25.3756	-0.561416	-Fh/PC -ads. OC	0.17675	99.0099	17.5
6	25	10	FeCl3x6H2O	C-DOC	post	0.49132	-25.3857	-0.551296	-Fh/PC -ads. OC	0.17675	99.0099	17.5
6	25	10	FeCl3x6H2O	C-DOC	post	1.19156	-25.494	-0.443015	-Fh/PC -ads. OC	0.3535	49.505	17.5
6	25	10	FeCl3x6H2O	C-DOC	post	1.18593	-25.5779	-0.359139	-Fh/PC -ads. OC	0.3535	49.505	17.5
6	25	10	FeCl3x6H2O	C-DOC	post	1.18875	-25.684	-0.252962	-Fh/PC -ads. OC	0.3535	49.505	17.5
6	25	10	FeCl3x6H2O	C-DOC	post	0.15064	-24.4176	-1.51943	-Fh/PC -ads. OC	0.0441875	396.04	17.5
6	25	10	FeCl3x6H2O	C-DOC	post	0.144695	-24.7069	-1.23015	-Fh/PC -ads. OC	0.0441875	396.04	17.5
6	25	10	FeCl3x6H2O	C-DOC	post	0.136414	-24.9275	-1.00945	-Fh/PC -ads. OC	0.0441875	396.04	17.5
6	25	10	FeCl3x6H2O	C-DOC	post	0.0100318	-24.2197	-1.71734	-Fh/PC -ads. OC	0.00088375	198.02	0.175
6	25	10	FeCl3x6H2O	C-DOC	post	0.00980768	-23.8446	-2.09243	-Fh/PC -ads. OC	0.00088375	198.02	0.175
6	25	10	FeCl3x6H2O	C-DOC	post	0.010068	-23.8294	-2.10759	-Fh/PC -ads. OC	0.00088375	198.02	0.175
6	25	10	FeCl3x6H2O	C-DOC	post	0.0541043	-24.7158	-1.22122	-Fh/PC -ads. OC	0.0088375	198.02	1.75
6	25	10	FeCl3x6H2O	C-DOC	post	0.0511897	-24.6478	-1.28921	-Fh/PC -ads. OC	0.0088375	198.02	1.75
6	25	10	FeCl3x6H2O	C-DOC	post	0.0517309	-24.4494	-1.48756	-Fh/PC -ads. OC	0.0088375	198.02	1.75
6	25	10	FeCl3x6H2O	C-DOC	post	0.277493	-25.1943	-0.742671	-Fh/PC -ads. OC	0.088375	198.02	17.5
6	25	10	FeCl3x6H2O	C-DOC	post	0.275422	-25.2499	-0.687059	-Fh/PC -ads. OC	0.088375	198.02	17.5
6	25	10	FeCl3x6H2O	C-DOC	post	0.282664	-25.2103	-0.726691	-Fh/PC -ads. OC	0.088375	198.02	17.5
6	25	10	FeCl3x6H2O	C-DOC	post	0.506853	-25.3869	-0.550134	-Fh/PC -ads. OC	0.17675	198.02	35
6	25	10	FeCl3x6H2O	C-DOC	post	0.514846	-25.3365	-0.600456	-Fh/PC -ads. OC	0.17675	198.02	35
6	25	10	FeCl3x6H2O	C-DOC	post	0.525582	-25.3881	-0.548926	-Fh/PC -ads. OC	0.17675	198.02	35
6	25	14	FeCl3x6H2O	C-DOC	post	0.0126518	-23.4179	-2.51908	-Fh/PC -ads. OC	0.00147292	198.02	0.291667
6	25	14	FeCl3x6H2O	C-DOC	post	0.0135664	-23.5352	-2.40178	-Fh/PC -ads. OC	0.00147292	198.02	0.291667
6	25	14	FeCl3x6H2O	C-DOC	post	0.0127049	-23.7526	-2.18443	-Fh/PC -ads. OC	0.00147292	198.02	0.291667
6	25	14	FeCl3x6H2O	C-DOC	post	0.0897349	-24.2248	-1.71223	-Fh/PC -ads. OC	0.0088375	198.02	1.75
6	25	14	FeCl3x6H2O	C-DOC	post	0.08183	-24.3022	-1.63481	-Fh/PC -ads. OC	0.0088375	198.02	1.75
6	25	14	FeCl3x6H2O	C-DOC	post	0.0843111	-24.1402	-1.79679	-Fh/PC -ads. OC	0.0088375	198.02	1.75
6	25	14	FeCl3x6H2O	C-DOC	post	0.33633	-25.2354	-0.701615	-Fh/PC -ads. OC	0.088375	198.02	17.5
6	25	14	FeCl3x6H2O	C-DOC	post	0.339779	-25.1544	-0.782554	-Fh/PC -ads. OC	0.088375	198.02	17.5
6	25	14	FeCl3x6H2O	C-DOC	post	0.335537	-25.1624	-0.77462	-Fh/PC -ads. OC	0.088375	198.02	17.5
