# Supplementary material for: The geologic history of marine dissolved organic carbon from iron oxides
Source: Nature. 2025 Aug 13;644(8078):945–51. doi: 10.1038/s41586-025-09383-3 (PMC12390840; doi:10.1038/s41586-025-09383-3)
Supplement: Supplementary file 6 — Iron ooid XRF-based elemental compositions. [file 41586_2025_9383_MOESM6_ESM.xlsx]

## Sheet:  Dataset S4
Formation	Country	Fe-Oxide mineral type	Fe [µg/g]	σ [µg/g]	Al [µg/g]	σ [µg/g]	Fraction of goethite (calculated)	Fraction of hematite (calculated)
Arroyofrio Bed	Spain	Goethite	515661	4319.07	32722.7	2205.19	0.818151	0.735241
Arroyofrio Bed	Spain	Goethite	470918	3659.95	33049.9	1918.58	0.747162	0.671446
Arroyofrio Bed	Spain	Goethite	480121	3790.16	31673.9	1981.64	0.761764	0.684568
Arroyofrio Bed	Spain	Goethite	525640	4493.88	39305.8	2369.16	0.833985	0.74947
Arroyofrio Bed	Spain	Goethite	490312	3955.28	43617.7	2032.83	0.777933	0.699098
Arroyofrio Bed	Spain	Goethite	437974	3233.25	37043.6	1666.93	0.694892	0.624473
Arroyofrio Bed	Spain	Goethite	522616	4428.47	48499.8	2313.83	0.829186	0.745157
Arroyofrio Bed	Spain	Goethite	495043	4021.36	42570.6	2027.95	0.785438	0.705843
Arroyofrio Bed	Spain	Goethite	432657	3060.02	30595.9	1243.66	0.686456	0.616892
Aseri	Estonia	Goethite	509368	4125.58	39518.7	1745.02	0.808168	0.726269
Aseri	Estonia	Goethite	533106	4437.25	47629.8	2040.32	0.84583	0.760115
Aseri	Estonia	Goethite	494778	3905.19	42070.2	1784.39	0.785018	0.705466
Aseri	Estonia	Goethite	560078	4863.28	75196.7	2690.37	0.888624	0.798572
Aseri	Estonia	Goethite	572016	5055.12	68995.7	2550.34	0.907565	0.815594
Aseri	Estonia	Goethite	562471	4916.98	69739.1	2553.72	0.892421	0.801985
Bliss	USA	Hematite	640872	6011.19	22719	1248.98	1.01681	0.913771
Bliss	USA	Hematite	640036	5946.8	22060.4	1213.2	1.01549	0.912578
Bliss	USA	Hematite	623403	5662.44	21434.6	1192.96	0.989095	0.888862
Bliss	USA	Hematite	653807	6192.19	25936.5	1396.29	1.03734	0.932214
Chuanlinggou	China	Hematite	619650	5589.87	11621.6	906.93	0.983142	0.883512
Chuanlinggou	China	Hematite	636171	5881.58	12213.7	972.71	1.00935	0.907067
Chuanlinggou	China	Hematite	619446	5658.08	12714.6	947.84	0.982817	0.88322
Chuanlinggou	China	Hematite	603610	5409.8	14661.5	964.69	0.957691	0.860641
Chuanlinggou	China	Hematite	600907	5338.3	16839.5	1006.74	0.953403	0.856787
Chuanlinggou	China	Hematite	644248	6086.72	18914.8	1144.41	1.02217	0.918584
Chuanlinggou	China	Hematite	654944	6201.76	22162.2	1272.8	1.03914	0.933835
Clinton	USA	Hematite	572239	4971.79	62621.2	2114.49	0.907919	0.815912
Clinton	USA	Hematite	650707	6368.32	100200	3475.66	1.03242	0.927792
Clinton	USA	Hematite	676466	6977.57	124887	4327.13	1.07329	0.964521
Clinton	USA	Hematite	618417	5775.09	79606.7	2708.96	0.981185	0.881753
Ferrous oolites of Villers	France	Goethite	480936	3680.16	48363.3	1648.02	0.763057	0.68573
Ferrous oolites of Villers	France	Goethite	471523	3541.04	47637.1	1588.26	0.748123	0.672309
Ferrous oolites of Villers	France	Goethite	504452	3974.68	59220	1960.9	0.800367	0.719259
Ferrous oolites of Villers	France	Goethite	478004	3639.1	49824.8	1639.53	0.758404	0.681549
Galeros	USA	Hematite	536292	4612.1	34185.1	424.01	0.850886	0.764658
Galeros	USA	Hematite	592384	4722.95	43542.4	-696.78	0.939881	0.844635
Galeros	USA	Hematite	644001	5557.68	-3925.3	1188.69	1.02178	0.918231
Hatira	Israel	Goethite	513139	4045.3	29505.5	1200.99	0.81415	0.731645
Hatira	Israel	Goethite	504430	3934.63	27682.3	1164.47	0.800332	0.719228
Hatira	Israel	Goethite	525370	4228.72	30094.3	1254.14	0.833556	0.749085
Hatira	Israel	Goethite	521200	4160.38	30992.1	1268.44	0.82694	0.743139
Hatira	Israel	Goethite	547375	4557.01	30927.7	1431.25	0.868469	0.78046
Hatira	Israel	Goethite	556115	4658.88	31271.8	1436.61	0.882336	0.792922
Hatira	Israel	Goethite	532852	4399.87	29887.4	1347.7	0.845427	0.759753
Hatira	Israel	Goethite	541998	4487.12	32936.2	1451.34	0.859938	0.772793
Hatira	Israel	Goethite	489956	3759.84	18338.5	967.76	0.777367	0.69859
Hatira	Israel	Goethite	498599	3870.31	20098.8	1016.29	0.791081	0.710915
Hatira	Israel	Goethite	491495	3810.89	20597.2	1011.74	0.779809	0.700785
Hatira	Israel	Goethite	517538	4164.96	22426.6	1183.27	0.821129	0.737918
Hatira	Israel	Goethite	514401	4098.77	23438.5	1191.71	0.816153	0.733446
Hatira	Israel	Goethite	497374	3852.56	21706.7	1119.79	0.789137	0.709167
Hatira	Israel	Goethite	486449	3704.55	20597.7	1088.8	0.771803	0.69359
Hatira	Israel	Goethite	494250	3838.42	23258.9	1079.94	0.78418	0.704713
Hatira	Israel	Goethite	493235	3803.96	21945.3	1035.4	0.78257	0.703265
Hatira	Israel	Goethite	496718	3862.8	23312.4	1080.85	0.788096	0.708232
Hatira	Israel	Goethite	504232	3964.19	23583.6	1115.14	0.800018	0.718945
Hatira	Israel	Goethite	544225	4471.32	27851.9	1320.89	0.863471	0.775969
Hatira	Israel	Goethite	565765	4842.03	31933.3	1485.96	0.897646	0.80668
Hatira	Israel	Goethite	472067	3536.07	27913.6	1314.41	0.748985	0.673084
Hatira	Israel	Goethite	535983	4479.29	40137.4	1853.5	0.850394	0.764217
Hatira	Israel	Goethite	551710	4756.94	40843.9	1932.36	0.875347	0.786641
Hidra	Israel	Goethite	508318	3991.79	27761.2	1177.2	0.806501	0.724771
Hidra	Israel	Goethite	511260	4045.34	27595.1	1135.6	0.811169	0.728967
Hidra	Israel	Goethite	508224	4047.96	25918.5	1126.16	0.806353	0.724638
Hidra	Israel	Goethite	527398	4273.95	31698.4	1270.43	0.836774	0.751977
Hidra	Israel	Goethite	532095	4325.83	33560.3	1287.91	0.844225	0.758673
Hidra	Israel	Goethite	547455	4502.41	34750.5	1375.79	0.868596	0.780574
Hidra	Israel	Goethite	511879	4043.11	31247.7	1233.43	0.812151	0.729849
Hidra	Israel	Goethite	513127	4075.06	32199.6	1305.09	0.814131	0.731628
Hidra	Israel	Goethite	602208	5491.7	48198.9	1946.5	0.955468	0.858642
Hidra	Israel	Goethite	611414	5645	54042.6	2178.02	0.970073	0.871768
Hidra	Israel	Goethite	498584	3874.46	29934.5	1194.81	0.791057	0.710893
Hidra	Israel	Goethite	496316	3832.83	29352.9	1168.78	0.787458	0.707658
Hidra	Israel	Goethite	500422	3876.64	30952.9	1213.5	0.793973	0.713513
Hidra	Israel	Goethite	609622	5589.35	41403.3	1881.45	0.96723	0.869213
Hidra	Israel	Goethite	603974	5515.19	41918.6	1904.39	0.958269	0.86116
Hidra	Israel	Goethite	599872	5470.38	39237.2	1768.17	0.951761	0.855312
Hidra	Israel	Goethite	584210	5149.44	40277.7	1705.53	0.926912	0.832981
Hidra	Israel	Goethite	556663	4668.88	34703.1	1472.75	0.883205	0.793703
Hidra	Israel	Goethite	551022	4699.76	48846.5	2027.34	0.874256	0.78566
Hidra	Israel	Goethite	473399	3574.81	41128.9	1388.51	0.751099	0.674984
Hidra	Israel	Goethite	471500	3568.32	42179.1	1346.64	0.748085	0.672275
Hidra	Israel	Goethite	478756	3660.76	42995.2	1388.08	0.759597	0.682621
Hidra	Israel	Goethite	507005	4017.71	29827.5	1240.45	0.804417	0.722899
Hidra	Israel	Goethite	578328	5037.67	41058.2	1755.22	0.91758	0.824594
Hidra	Israel	Goethite	539750	4475.8	32730.1	1378.71	0.856372	0.769589
Hidra	Israel	Goethite	542972	4491.14	30790.7	1430.09	0.861483	0.774182
Hidra	Israel	Goethite	577185	5915.41	43662.7	2051.5	0.915765	0.822963
Hidra	Israel	Goethite	575765	5918.63	49876.4	2343.72	0.913513	0.82094
Hidra	Israel	Goethite	576985	5920.85	46518.3	2160.28	0.915449	0.822679
Hidra	Israel	Goethite	546939	4539.13	29604	1303.16	0.867777	0.779838
Hidra	Israel	Goethite	529701	4264.12	29411.6	1287.52	0.840427	0.75526
Hidra	Israel	Goethite	574651	4968.47	35556.1	1506.76	0.911745	0.81935
Hidra	Israel	Goethite	581655	5075.65	36799.1	1634.66	0.922858	0.829337
Hidra	Israel	Goethite	492074	3806.85	23880.7	1110.75	0.780729	0.701611
Hidra	Israel	Goethite	492918	3853.89	24585.1	1118.13	0.782068	0.702815
Hidra	Israel	Goethite	547129	4549.35	30860.4	1425.96	0.868079	0.780109
Lisakovsk deposit	Kazakhstan	Goethite	523953	4316.34	45077.5	1674.79	0.831307	0.747064
Lisakovsk deposit	Kazakhstan	Goethite	541236	4526.59	51893.8	1927.48	0.858729	0.771707
Lisakovsk deposit	Kazakhstan	Goethite	561533	4862.44	53274.3	2041.13	0.890932	0.800646
Lisakovsk deposit	Kazakhstan	Goethite	608220	5698.22	72595.8	2835.72	0.965006	0.867214
Lisakovsk deposit	Kazakhstan	Goethite	557578	4786.07	52781.5	2007.58	0.884658	0.795008
Lyulinvor	Russia	Goethite	472432	3536.47	29468.4	1159.24	0.749563	0.673604
Lyulinvor	Russia	Goethite	475556	3587.8	30654.4	1171.62	0.754521	0.678059
Lyulinvor	Russia	Goethite	476866	3611.44	30652.6	1164.61	0.756599	0.679927
McClure	USA	Hematite	664631	4986.14	42024.1	2114.86	1.05451	0.947646
McClure	USA	Hematite	602566	4797.37	36272.9	1488.41	0.956035	0.859152
McClure	USA	Hematite	587144	4039.4	62004.8	1184.22	0.931567	0.837164
Oolite Ferrugineuse de Bayeux	France	Goethite	461714	3559.32	32736.5	1816.83	0.732559	0.658323
Oolite Ferrugineuse de Bayeux	France	Goethite	567865	5120.99	54145.6	3015.38	0.900979	0.809676
Oolite Ferrugineuse de Bayeux	France	Goethite	511538	4268.43	44607	2422.79	0.81161	0.729363
Oolite Ferrugineuse de Bayeux	France	Goethite	550337	4833.93	51162.2	2823.69	0.873169	0.784684
Oolite Ferrugineuse de Bayeux	France	Goethite	544646	4805.89	48426.2	2704.75	0.864139	0.776569
Panarea Island	Italy	Goethite	492074	3806.85	23880.7	1110.75	0.780729	0.701611
Panarea Island	Italy	Goethite	492918	3853.89	24585.1	1118.13	0.782068	0.702815
Panarea Island	Italy	Goethite	547129	4549.35	30860.4	1425.96	0.868079	0.780109
Presles	Belgium	Hematite	538680	4448.13	57407	1877.06	0.854673	0.768062
Presles	Belgium	Hematite	531436	4323.14	57606.7	1822.3	0.84318	0.757734
Presles	Belgium	Hematite	503654	3967.95	52232.3	1654.76	0.799102	0.718122
Presles	Belgium	Hematite	496378	3869.12	46513.2	1522.17	0.787556	0.707747
Presles	Belgium	Hematite	525123	4250.28	52179.6	1717.41	0.833164	0.748733
Presles	Belgium	Hematite	471543	3561.08	59196.4	1722.08	0.748153	0.672336
Presles	Belgium	Hematite	517015	4146.8	74696.2	2217.5	0.8203	0.737172
Presles	Belgium	Hematite	481025	3661.2	62994.5	1828.61	0.763198	0.685857
Presles	Belgium	Hematite	482492	3681.14	62427.4	1841.12	0.765525	0.687948
Sarka	Czechia	Hematite	562320	5108.43	9873.4	1307.08	0.892181	0.801769
Sarka	Czechia	Hematite	616302	5213.74	54590.6	720.27	0.977829	0.878738
Sarka	Czechia	Hematite	612793	5916.88	43897.7	1049.31	0.972262	0.873735
Sherwin	Australia	Hematite	591943	5229.89	20838.1	1070.91	0.939181	0.844007
Sherwin	Australia	Hematite	592780	5230.58	22996.2	1118.75	0.940508	0.845199
Sherwin	Australia	Hematite	593509	5224.8	22487.6	1097.29	0.941666	0.846239
Sherwin	Australia	Hematite	578119	4994.26	17143.5	1004.42	0.917248	0.824296
Sherwin	Australia	Hematite	609349	5437.6	18318	1120.01	0.966798	0.868825
Sherwin	Australia	Hematite	602449	5354.47	17863.4	1093.24	0.955849	0.858985
Sherwin	Australia	Hematite	596107	5268.17	16438.9	1039.35	0.945788	0.849944
Sherwin	Australia	Hematite	611982	5520.6	24792.9	1221.12	0.970975	0.872578
Sherwin	Australia	Hematite	633436	5892.3	26548.7	1339.52	1.00501	0.903168
Sherwin	Australia	Hematite	620107	5627.31	26215.2	1256.92	0.983866	0.884163
Sherwin	Australia	Hematite	606048	5443.14	23281.3	1177.72	0.961561	0.864118
Sillaoru	Estonia	Goethite	479691	3651.73	33647.9	1291.89	0.761081	0.683954
Sillaoru	Estonia	Goethite	478621	3622.85	33846.6	1271.63	0.759384	0.682429
Sillaoru	Estonia	Goethite	477991	3623.21	35002.4	1330.07	0.758384	0.68153
The Skovde Limestone	Sweden	Hematite	551948	6732.96	51215.3	1833.1	0.875725	0.786981
The Skovde Limestone	Sweden	Hematite	682358	4875.99	28771.2	2459.69	1.08263	0.972921
The Skovde Limestone	Sweden	Hematite	588526	3454.74	36994.2	1625.06	0.93376	0.839135
Volcanic island Mahengetang	Indonesia	Goethite	456546	3345.31	8699.6	774.07	0.724359	0.650954
Volcanic island Mahengetang	Indonesia	Goethite	461795	3447.47	8360.02	780.7	0.732687	0.658438
Volcanic island Mahengetang	Indonesia	Goethite	455795	3286.53	8912.84	795.65	0.723167	0.649883
Wedelsandstein (Blaukalk mb)	Germany	Goethite	491794	3786.84	34435.9	1404.23	0.780284	0.701211
Wedelsandstein (Blaukalk mb)	Germany	Goethite	541943	4563.25	46503.1	1841.95	0.859851	0.772715
Wedelsandstein (Blaukalk mb)	Germany	Goethite	490794	3807.02	34066.6	1370.03	0.778697	0.699785
Wedelsandstein (Blaukalk mb)	Germany	Goethite	523569	4276.37	43288	1662.55	0.830698	0.746516
