# Supplementary material for: The geologic history of marine dissolved organic carbon from iron oxides
Source: Nature. 2025 Aug 13;644(8078):945–51. doi: 10.1038/s41586-025-09383-3 (PMC12390840; doi:10.1038/s41586-025-09383-3)
Supplement: Supplementary file 7 — Compilation of crude oil δ13C values. [file 41586_2025_9383_MOESM7_ESM.xlsx]

## Sheet: Dataset S5
Geological period	Age (Ma)	δ13C (‰, VPDB)	Compound	Reference		* In cases where individual values could not be extracted, we utilized a range specifying maximum and minimum values. For more detailes, please refer to Andrusevich et al. (1998).
Neogene	10.3184	-24.525	Crude oils	Stahl, 1977	Quaternary	** Age assignments for the geological stages were based on the mean values determined from the authors' conclusions.
Neogene	10.4764	-26.5389	European continent Crude oil	Botneva et al., 1984	IF(A1>=2.6, "Neogene",	*** In instances where no bulk oil δ13C was reported, the δ13C of the saturate fraction was utilized instead.
Neogene	10.7331	-21.8117	Crude oil C15 saturates	Andrusevich et al., 1998	IF(A1>=23.03, "Paleogene",
Neogene	10.8143	-22.8467	Marine crude oil	Chung et al., 1992	IF(A1>=66, "Cretaceous",
Neogene	10.9548	-24.6369	American continent Crude oil	Botneva et al., 1984	IF(A1>=145, "
Neogene	11.0162	-25.4201	Crude oil	Botneva et al., 1984
Paleogene	28.47	-21.9	Marine crude oil	Hail Hakimi et al (2018)
Paleogene	34.29	-21.3	Crude oil	Márquez et al., 2022
Paleogene	34.29	-21.4	Crude oil	Márquez et al., 2022
Paleogene	34.29	-25.9	Crude oil	Márquez et al., 2022
Paleogene	34.29	-20.8	Crude oil	Márquez et al., 2022
Paleogene	34.29	-29.8	Crude oil	Márquez et al., 2022
Paleogene	34.29	-29.3	Crude oil	Márquez et al., 2022
Paleogene	34.29	-29.1	Crude oil	Márquez et al., 2022
Paleogene	34.29	-29.2	Crude oil	Márquez et al., 2022
Paleogene	34.29	-26.2	Crude oil	Márquez et al., 2022
Paleogene	34.29	-27.3	Crude oil	Márquez et al., 2022
Paleogene	34.29	-27.9	Crude oil	Márquez et al., 2022
Paleogene	34.29	-28.1	Crude oil	Márquez et al., 2022
Paleogene	34.29	-27.6	Crude oil	Márquez et al., 2022
Paleogene	34.29	-27.1	Crude oil	Márquez et al., 2022
Paleogene	34.29	-26.6	Crude oil	Márquez et al., 2022
Paleogene	34.29	-27.5	Crude oil	Márquez et al., 2022
Paleogene	34.29	-27	Crude oil	Márquez et al., 2022
Paleogene	34.29	-27.1	Crude oil	Márquez et al., 2022
Paleogene	34.29	-27.3	Crude oil	Márquez et al., 2022
Paleogene	34.29	-27.2	Crude oil	Márquez et al., 2022
Paleogene	34.29	-27.1	Crude oil	Márquez et al., 2022
Paleogene	34.29	-28.1	Crude oil	Márquez et al., 2022
Paleogene	34.29	-26.5	Crude oil	Márquez et al., 2022
Paleogene	34.29	-20.9	Crude oil	Márquez et al., 2022
Paleogene	34.29	-26.7	Crude oil	Márquez et al., 2022
Paleogene	34.29	-26.6	Crude oil	Márquez et al., 2022
Paleogene	34.29	-26.9	Crude oil	Márquez et al., 2022
Paleogene	34.29	-26.4	Crude oil	Márquez et al., 2022
Paleogene	34.29	-26.3	Crude oil	Márquez et al., 2022
Paleogene	39.52	-21.259	Crude oil	Fildani et al., 2005
Paleogene	39.52	-20.741	Crude oil	Fildani et al., 2005
Paleogene	39.52	-21.312	Crude oil	Fildani et al., 2005
Paleogene	39.52	-20.782	Crude oil	Fildani et al., 2005
Paleogene	39.52	-20.782	Crude oil	Fildani et al., 2005
Paleogene	39.52	-20.65	Crude oil	Fildani et al., 2005
Paleogene	39.52	-22.056	Crude oil	Fildani et al., 2005
Paleogene	39.52	-21.853	Crude oil	Fildani et al., 2005
Paleogene	39.52	-21.483	Crude oil	Fildani et al., 2005
Paleogene	43.5821	-24.5265	Crude oils	Stahl, 1977
Paleogene	43.5909	-24.6384	American continent Crude oil	Botneva et al., 1984
Paleogene	43.6523	-25.4216	Crude oil	Grizzle et al., 1979
Paleogene	43.7379	-26.5125	European continent Crude oil	Botneva et al., 1984
Paleogene	43.7423	-26.5685	Marine crude oils	Chung et al., 1992
Paleogene	44.4862	-28.051	Crude oil C15 saturates	Andrusevich et al., 1998
Paleogene	44.95	-21.6	Marine crude oil	Hail Hakimi et al (2018)
Cretaceous	83.25	-24.8	Terrestrial Crude oil	Hail Hakimi et al (2018)
Cretaceous	103.322	-26.0118	American continent Crude oil	Botneva et al., 1984
Cretaceous	103.509	-28.3894	Crude oil	Grizzle et al., 1979
Cretaceous	103.524	-28.5852	Marine crude oil	Chung et al., 1992
Cretaceous	103.958	-26.1237	Crude oil	Stahl, 1977
Cretaceous	103.976	-26.3475	European continent Crude oil	Botneva et al., 1984
Cretaceous	105.5	-27.3	Crude oil	Abdula, 2020
Cretaceous	105.5	-25.7	Crude oil	Abdula, 2020
Cretaceous	106.75	-27.86	Crude oil	Al-Khafaji et al., 2021
Cretaceous	106.75	-28	Crude oil	Al-Khafaji et al., 2021
Cretaceous	106.75	-27.68	Crude oil	Al-Khafaji et al., 2021
Cretaceous	127.2	-27.17	Crude oil	Al-Khafaji et al., 2021
Cretaceous	127.2	-27.38	Crude oil	Al-Khafaji et al., 2021
Cretaceous	127.2	-27.7	Crude oil	Al-Khafaji et al., 2021
Cretaceous	127.2	-28.12	Crude oil	Al-Khafaji et al., 2021
Cretaceous	127.2	-26.83	Crude oil	Al-Khafaji et al., 2021
Cretaceous	127.2	-27.89	Crude oil	Al-Khafaji et al., 2021
Cretaceous	127.2	-27.83	Crude oil	Al-Khafaji et al., 2021
Cretaceous	127.2	-27.89	Crude oil	Al-Khafaji et al., 2021
Cretaceous	127.2	-27.52	Crude oil	Al-Khafaji et al., 2021
Cretaceous	127.2	-27.88	Crude oil	Al-Khafaji et al., 2021
Cretaceous	127.2	-27.84	Crude oil	Al-Khafaji et al., 2021
Cretaceous	127.2	-27.68	Crude oil	Al-Khafaji et al., 2021
Cretaceous	129.75	-27.5	Crude oil	Abdula, 2020
Cretaceous	129.75	-27.2	Crude oil	Abdula, 2020
Cretaceous	129.75	-27.3	Crude oil	Abdula, 2020
Cretaceous	129.75	-28.1	Crude oil	Abdula, 2020
Cretaceous	129.75	-29	Terrestrial Crude oil	Hirner and Lyon, 1989
Cretaceous	129.75	-27.3	Terrestrial Crude oil	Hirner and Lyon, 1989
Cretaceous	129.75	-28.1	Terrestrial Crude oil	Hirner and Lyon, 1989
Cretaceous	129.75	-26.8	Terrestrial Crude oil	Hirner and Lyon, 1989
Cretaceous	129.75	-27.7	Terrestrial Crude oil	Hirner and Lyon, 1989
Cretaceous	129.75	-27.7	Terrestrial Crude oil	Hirner and Lyon, 1989
Cretaceous	129.75	-27.5	Terrestrial Crude oil	Hirner and Lyon, 1989
Cretaceous	129.75	-27.4	Terrestrial Crude oil	Hirner and Lyon, 1989
Cretaceous	129.75	-27.2	Terrestrial Crude oil	Hirner and Lyon, 1989
Cretaceous	129.75	-27.5	Terrestrial Crude oil	Hirner and Lyon, 1989
Cretaceous	129.75	-27.5	Terrestrial Crude oil	Hirner and Lyon, 1989
Cretaceous	129.75	-27.1	Terrestrial Crude oil	Hirner and Lyon, 1989
Cretaceous	129.75	-26	Terrestrial Crude oil	Hirner and Lyon, 1989
Cretaceous	129.75	-26.5	Terrestrial Crude oil	Hirner and Lyon, 1989
Cretaceous	129.75	-26.6	Terrestrial Crude oil	Hirner and Lyon, 1989
Cretaceous	129.75	-28	Terrestrial Crude oil	Hirner and Lyon, 1989
Cretaceous	129.75	-28.4	Terrestrial Crude oil	Hirner and Lyon, 1989
Cretaceous	129.75	-28	Terrestrial Crude oil	Hirner and Lyon, 1989
Cretaceous	129.75	-27.1	Terrestrial Crude oil	Hirner and Lyon, 1989
Cretaceous	129.75	-27.3	Terrestrial Crude oil	Hirner and Lyon, 1989
Cretaceous	129.75	-25.4	Terrestrial Crude oil	Hirner and Lyon, 1989
Cretaceous	129.75	-27.3	Terrestrial Crude oil	Hirner and Lyon, 1989
Cretaceous	129.75	-27.1	Terrestrial Crude oil	Hirner and Lyon, 1989
Cretaceous	129.75	-26.9	Terrestrial Crude oil	Hirner and Lyon, 1989
Cretaceous	129.75	-26.2	Terrestrial Crude oil	Hirner and Lyon, 1989
Jurassic	168.5	-27.6	Crude oil	Abdula, 2020
Jurassic	168.5	-27.6	Crude oil	Abdula, 2020
Jurassic	168.5	-27.7	Crude oil	Abdula, 2020
Jurassic	168.5	-27.6	Crude oil	Abdula, 2020
Jurassic	168.5	-27.5	Crude oil	Abdula, 2020
Jurassic	168.5	-27.5	Crude oil	Abdula, 2020
Jurassic	168.5	-27.6	Crude oil	Abdula, 2020
Jurassic	173	-23.94	Marine crude oils	Sofer, 1988
Jurassic	173	-24.89	Marine crude oils	Sofer, 1988
Jurassic	173	-24	Marine crude oils	Sofer, 1988
Jurassic	173	-24.18	Marine crude oils	Sofer, 1988
Jurassic	173	-21.6	Marine crude oils	Sofer, 1988
Jurassic	173	-24.53	Marine crude oils	Sofer, 1988
Jurassic	173	-24.53	Marine crude oils	Sofer, 1988
Jurassic	173	-22.88	Marine crude oils	Sofer, 1988
Jurassic	173	-25.51	Marine crude oils	Sofer, 1988
Jurassic	173	-24.96	Marine crude oils	Sofer, 1988
Jurassic	173	-25.88	Marine crude oils	Sofer, 1988
Jurassic	173	-25.51	Marine crude oils	Sofer, 1988
Jurassic	173	-25.55	Marine crude oils	Sofer, 1988
Jurassic	173	-24.32	Marine crude oils	Sofer, 1988
Jurassic	173	-25.29	Marine crude oils	Sofer, 1988
Jurassic	173	-25.09	Marine crude oils	Sofer, 1988
Jurassic	173	-26.11	Marine crude oils	Sofer, 1988
Jurassic	173	-25.59	Marine crude oils	Sofer, 1988
Jurassic	173	-25.54	Marine crude oils	Sofer, 1988
Jurassic	173	-25.45	Marine crude oils	Sofer, 1988
Jurassic	173	-24.52	Marine crude oils	Sofer, 1988
Jurassic	173	-25.6	Marine crude oils	Sofer, 1988
Jurassic	173	-25.68	Marine crude oils	Sofer, 1988
Jurassic	173	-25.07	Marine crude oils	Sofer, 1988
Jurassic	173	-29.31	Marine crude oils	Sofer, 1988
Jurassic	177.315	-25.1761	European continent Crude oil	Botneva et al., 1984
Jurassic	177.618	-25.0363	Crude oils	Grizzle et al., 1979
Jurassic	178.129	-27.5538	Crude oils	Stahl, 1977
Jurassic	178.156	-27.8894	American continent Crude oil	Botneva et al., 1984
Jurassic	178.761	-27.6097	Marine crude oils	Chung et al., 1992
Jurassic	178.801	-28.1132	Crude oil C15 saturates	Andrusevich et al., 1998
Jurassic	200	-28.5	Crude oil	Abdula, 2020
Jurassic	200	-28.4	Crude oil	Abdula, 2020
Jurassic	200	-28.2	Crude oil	Abdula, 2020
Jurassic	200	-28.2	Crude oil	Abdula, 2020
Triassic	229.686	-28.731	European continent Crude oil	Botneva et al., 1984
Triassic	229.739	-29.4023	Crude oils	Grizzle et al., 1979
Triassic	229.851	-30.8289	Crude oil C15 saturates	Andrusevich et al., 1998
Triassic	230.426	-30.1576	Crude oils	Stahl, 1977
Triassic	230.443	-30.3814	Marine crude oils	Chung et al., 1992
Triassic	230.45	-30.4653	American continent Crude oil	Botneva et al., 1984
Permian	262.893	-28.0053	American continent Crude oil	Botneva et al., 1984
Permian	263.327	-25.5437	European continent Crude oil	Botneva et al., 1984
Permian	263.533	-28.1731	Marine crude oils	Chung et al., 1992
Permian	263.604	-29.0682	Crude oils	Grizzle et al., 1979
Permian	263.623	-29.32	Crude oil C15 saturates	Andrusevich et al., 1998
Permian	264.824	-28.6207	Crude oils	Stahl, 1977
Carboniferous	322.453	-27.1969	Crude oils	Stahl, 1977
Carboniferous	322.464	-27.3367	European continent Crude oil	Botneva et al., 1984
Carboniferous	322.718	-30.5815	Crude oils	Grizzle et al., 1979
Carboniferous	323.069	-27.057	American continent Crude oil	Botneva et al., 1984
Carboniferous	323.151	-28.092	Marine crude oils	Chung et al., 1992
Carboniferous	323.971	-30.5536	Crude oil C15 saturates	Andrusevich et al., 1998
Carboniferous	329	-30.86	Marine crude oils	Tian et al., 2012
Carboniferous	329	-29.38	Marine crude oils	Tian et al., 2012
Carboniferous	329	-29.38	Marine crude oils	Tian et al., 2012
Carboniferous	329	-31.72	Marine crude oils	Tian et al., 2012
Carboniferous	329	-33.16	Marine crude oils	Tian et al., 2012
Carboniferous	329	-33.11	Marine crude oils	Tian et al., 2012
Carboniferous	329	-32.47	Marine crude oils	Tian et al., 2012
Carboniferous	329	-32.18	Marine crude oils	Tian et al., 2012
Carboniferous	329	-32.7	Marine crude oils	Tian et al., 2012
Carboniferous	329	-32.83	Marine crude oils	Tian et al., 2012
Carboniferous	329	-31.89	Marine crude oils	Tian et al., 2012
Carboniferous	329	-33.42	Marine crude oils	Tian et al., 2012
Carboniferous	329	-33.02	Marine crude oils	Tian et al., 2012
Carboniferous	329	-33	Marine crude oils	Tian et al., 2012
Carboniferous	329	-31.91	Marine crude oils	Tian et al., 2012
Carboniferous	329	-30.89	Marine crude oils	Tian et al., 2012
Carboniferous	329	-32.3	Marine crude oils	Tian et al., 2012
Carboniferous	329	-33.38	Marine crude oils	Tian et al., 2012
Carboniferous	329	-31.42	Marine crude oils	Tian et al., 2012
Carboniferous	329	-32.52	Marine crude oils	Tian et al., 2012
Carboniferous	329	-31.79	Marine crude oils	Tian et al., 2012
Carboniferous	329	-32.91	Marine crude oils	Tian et al., 2012
Carboniferous	329	-31.87	Marine crude oils	Tian et al., 2012
Carboniferous	329	-31.03	Marine crude oils	Tian et al., 2012
Carboniferous	329	-31.62	Marine crude oils	Tian et al., 2012
Devonian	383.505	-29.4095	Crude oils	Grizzle et al., 1979
Devonian	383.979	-27.4515	Crude oils	Stahl, 1977
Devonian	383.992	-27.6193	American continent Crude oil	Botneva et al., 1984
Devonian	384.023	-28.0109	European continent Crude oil	Botneva et al., 1984
Devonian	384.038	-28.2067	Marine crude oils	Chung et al., 1992
Devonian	384.786	-29.7452	Crude oil C15 saturates	Andrusevich et al., 1998
Silurian	422.964	-28.3764	Marine crude oils	Chung et al., 1992
Silurian	423.058	-29.5792	Crude oils	Grizzle et al., 1979
Silurian	431.5	-32	Marine crude oils	Tian et al., 2012
Silurian	431.5	-28.61	Marine crude oils	Tian et al., 2012
Silurian	431.5	-32.07	Marine crude oils	Tian et al., 2012
Silurian	431.5	-31.96	Marine crude oils	Tian et al., 2012
Silurian	431.5	-32.02	Marine crude oils	Tian et al., 2012
Silurian	431.5	-31.91	Marine crude oils	Tian et al., 2012
Silurian	431.5	-31.92	Marine crude oils	Tian et al., 2012
Silurian	431.5	-32.3	Marine crude oils	Tian et al., 2012
Silurian	431.5	-32.27	Marine crude oils	Tian et al., 2012
Silurian	431.5	-31.94	Marine crude oils	Tian et al., 2012
Silurian	431.5	-32.33	Marine crude oils	Tian et al., 2012
Silurian	431.5	-31.98	Marine crude oils	Tian et al., 2012
Silurian	431.5	-32.42	Marine crude oils	Tian et al., 2012
Silurian	431.5	-32.33	Marine crude oils	Tian et al., 2012
Silurian	431.5	-32.36	Marine crude oils	Tian et al., 2012
Silurian	431.5	-32.97	Marine crude oils	Tian et al., 2012
Silurian	431.5	-31.57	Marine crude oils	Tian et al., 2012
Silurian	431.5	-32.97	Marine crude oils	Tian et al., 2012
Ordovician	464.5	-31.66	Marine crude oils	Tian et al., 2012
Ordovician	464.5	-31.33	Marine crude oils	Tian et al., 2012
Ordovician	464.5	-31.72	Marine crude oils	Tian et al., 2012
Ordovician	464.5	-32.02	Marine crude oils	Tian et al., 2012
Ordovician	464.5	-31.61	Marine crude oils	Tian et al., 2012
Ordovician	464.5	-31.65	Marine crude oils	Tian et al., 2012
Ordovician	464.5	-31.58	Marine crude oils	Tian et al., 2012
Ordovician	464.5	-31.62	Marine crude oils	Tian et al., 2012
Ordovician	464.5	-31.27	Marine crude oils	Tian et al., 2012
Ordovician	464.5	-31.56	Marine crude oils	Tian et al., 2012
Ordovician	464.5	-32.17	Marine crude oils	Tian et al., 2012
Ordovician	464.5	-32.4	Marine crude oils	Tian et al., 2012
Ordovician	464.5	-31.99	Marine crude oils	Tian et al., 2012
Ordovician	464.5	-31.78	Marine crude oils	Tian et al., 2012
Ordovician	464.5	-32	Marine crude oils	Tian et al., 2012
Ordovician	464.5	-32.46	Marine crude oils	Tian et al., 2012
Ordovician	464.5	-32.56	Marine crude oils	Tian et al., 2012
Ordovician	464.5	-31.57	Marine crude oils	Tian et al., 2012
Ordovician	464.5	-31.58	Marine crude oils	Tian et al., 2012
Ordovician	464.5	-31.51	Marine crude oils	Tian et al., 2012
Ordovician	464.5	-31.65	Marine crude oils	Tian et al., 2012
Ordovician	464.5	-32.49	Marine crude oils	Tian et al., 2012
Ordovician	464.5	-31.12	Marine crude oils	Tian et al., 2012
Ordovician	464.5	-32.81	Marine crude oils	Tian et al., 2012
Ordovician	464.5	-31.79	Marine crude oils	Tian et al., 2012
Ordovician	464.5	-31.88	Marine crude oils	Tian et al., 2012
Ordovician	464.5	-31.84	Marine crude oils	Tian et al., 2012
Ordovician	464.5	-32.17	Marine crude oils	Tian et al., 2012
Ordovician	464.5	-31.97	Marine crude oils	Tian et al., 2012
Ordovician	464.5	-31.98	Marine crude oils	Tian et al., 2012
Ordovician	464.5	-31.16	Marine crude oils	Tian et al., 2012
Ordovician	464.5	-32.24	Marine crude oils	Tian et al., 2012
Ordovician	464.5	-32.26	Marine crude oils	Tian et al., 2012
Ordovician	464.5	-32	Marine crude oils	Tian et al., 2012
Ordovician	464.5	-30.3	Marine crude oils	Tian et al., 2012
Ordovician	464.5	-31.89	Marine crude oils	Tian et al., 2012
Ordovician	464.5	-32	Marine crude oils	Tian et al., 2012
Ordovician	464.5	-32.02	Marine crude oils	Tian et al., 2012
Ordovician	464.5	-31.94	Marine crude oils	Tian et al., 2012
Ordovician	464.5	-31.83	Marine crude oils	Tian et al., 2012
Ordovician	464.5	-32.2	Marine crude oils	Tian et al., 2012
Ordovician	464.5	-32.14	Marine crude oils	Tian et al., 2012
Ordovician	464.5	-32.13	Marine crude oils	Tian et al., 2012
Ordovician	464.5	-32.14	Marine crude oils	Tian et al., 2012
Ordovician	464.5	-32.15	Marine crude oils	Tian et al., 2012
Ordovician	464.5	-33.21	Marine crude oils	Tian et al., 2012
Ordovician	464.5	-30.24	Marine crude oils	Tian et al., 2012
Ordovician	464.5	-29.79	Marine crude oils	Tian et al., 2012
Ordovician	464.5	-31.93	Marine crude oils	Tian et al., 2012
Ordovician	464.5	-32.23	Marine crude oils	Tian et al., 2012
Ordovician	464.5	-31.94	Marine crude oils	Tian et al., 2012
Ordovician	464.5	-31.98	Marine crude oils	Tian et al., 2012
Ordovician	464.5	-32.26	Marine crude oils	Tian et al., 2012
Ordovician	464.5	-31.13	Marine crude oils	Tian et al., 2012
Ordovician	464.5	-33.27	Marine crude oils	Tian et al., 2012
Ordovician	464.5	-31.87	Marine crude oils	Tian et al., 2012
Ordovician	464.5	-31.5	Marine crude oils	Tian et al., 2012
Ordovician	464.5	-31.07	Marine crude oils	Tian et al., 2012
Ordovician	464.5	-31.62	Marine crude oils	Tian et al., 2012
Ordovician	464.5	-33.46	Marine crude oils	Tian et al., 2012
Ordovician	471.977	-29.1339	Crude oils	Stahl, 1977
Ordovician	472.025	-29.7493	American continent Crude oil	Botneva et al., 1984
Ordovician	472.06	-30.1968	European continent Crude oil	Botneva et al., 1984
Ordovician	472.6	-29.078	Crude oil C15 saturates	Andrusevich et al., 1998
Proterozoic	542	-35.6	Crude oil	Grosjean et al., 2009
Proterozoic	542	-34.2	Crude oil	Grosjean et al., 2009
Proterozoic	542	-35.7	Crude oil	Grosjean et al., 2009
Proterozoic	542	-35.1	Crude oil	Grosjean et al., 2009
Proterozoic	542	-34.2	Crude oil	Grosjean et al., 2009
Proterozoic	542	-34.9	Crude oil	Grosjean et al., 2009
Proterozoic	542	-34.7	Crude oil	Grosjean et al., 2009
Proterozoic	542	-35.2	Crude oil	Grosjean et al., 2009
Proterozoic	542	-34.8	Crude oil	Grosjean et al., 2009
Proterozoic	542	-35	Crude oil	Grosjean et al., 2009
Proterozoic	542	-35.4	Crude oil	Grosjean et al., 2009
Proterozoic	542	-34.9	Crude oil	Grosjean et al., 2009
Proterozoic	542	-34.9	Crude oil	Grosjean et al., 2009
Proterozoic	542	-34.7	Crude oil	Grosjean et al., 2009
Proterozoic	542	-34.5	Crude oil	Grosjean et al., 2009
Proterozoic	542	-34.4	Crude oil	Grosjean et al., 2009
Proterozoic	542	-35.2	Crude oil	Grosjean et al., 2009
Proterozoic	542	-34.7	Crude oil	Grosjean et al., 2009
Proterozoic	542	-35.9	Crude oil	Grosjean et al., 2009
Proterozoic	542	-34.8	Crude oil	Grosjean et al., 2009
Proterozoic	542	-34.6	Crude oil	Grosjean et al., 2009
Proterozoic	542	-35.2	Crude oil	Grosjean et al., 2009
Proterozoic	542	-34.8	Crude oil	Grosjean et al., 2009
Proterozoic	542	-36.1	Crude oil	Grosjean et al., 2009
Proterozoic	542	-35.4	Crude oil	Grosjean et al., 2009
Proterozoic	542	-33.9	Crude oil	Grosjean et al., 2009
Proterozoic	542	-35.4	Crude oil	Grosjean et al., 2009
Proterozoic	542	-34.8	Crude oil	Grosjean et al., 2009
Proterozoic	542	-36.2	Crude oil	Grosjean et al., 2009
Proterozoic	542	-35.8	Crude oil	Grosjean et al., 2009
Proterozoic	542	-35.5	Crude oil	Grosjean et al., 2009
Proterozoic	542	-35.2	Crude oil	Grosjean et al., 2009
Proterozoic	542	-35.3	Crude oil	Grosjean et al., 2009
Proterozoic	542	-36.1	Crude oil	Grosjean et al., 2009
Proterozoic	542	-35.9	Crude oil	Grosjean et al., 2009
Proterozoic	542	-35.7	Crude oil	Grosjean et al., 2009
Proterozoic	542	-35.8	Crude oil	Grosjean et al., 2009
Proterozoic	542	-35.7	Crude oil	Grosjean et al., 2009
Proterozoic	542	-35	Crude oil	Grosjean et al., 2009
Proterozoic	542	-30.3	Crude oil	Grosjean et al., 2009
Proterozoic	542	-31.8	Crude oil	Grosjean et al., 2009
Proterozoic	542	-32.4	Crude oil	Grosjean et al., 2009
Proterozoic	542	-31.2	Crude oil	Grosjean et al., 2009
Proterozoic	542	-31.3	Crude oil	Grosjean et al., 2009
Proterozoic	542	-30.5	Crude oil	Grosjean et al., 2009
Proterozoic	542	-35.1	Crude oil	Grosjean et al., 2009
Proterozoic	542	-34.4	Crude oil	Grosjean et al., 2009
Proterozoic	542	-34.7	Crude oil	Grosjean et al., 2009
Proterozoic	542	-35.4	Crude oil	Grosjean et al., 2009
Proterozoic	542	-33.7	Crude oil	Grosjean et al., 2009
Proterozoic	542	-36.4	Crude oil	Grosjean et al., 2009
Proterozoic	542	-35.3	Crude oil	Grosjean et al., 2009
Proterozoic	588	-33.5	Crude oil	Kelly et al., 2011
Proterozoic	588	-33.3	Crude oil	Kelly et al., 2011
Proterozoic	588	-33.4	Crude oil	Kelly et al., 2011
Proterozoic	588	-33.4	Crude oil	Kelly et al., 2011
Proterozoic	588	-33.4	Crude oil	Kelly et al., 2011
Proterozoic	588	-33.3	Crude oil	Kelly et al., 2011
Proterozoic	588	-33.9	Crude oil	Kelly et al., 2011
Proterozoic	588	-34.4	Crude oil	Kelly et al., 2011
Proterozoic	588	-34.5	Crude oil	Kelly et al., 2011
Proterozoic	588	-33.9	Crude oil	Kelly et al., 2011
Proterozoic	588	-34.4	Crude oil	Kelly et al., 2011
Proterozoic	588	-34	Crude oil	Kelly et al., 2011
Proterozoic	588	-35.1	Crude oil	Kelly et al., 2011
Proterozoic	588	-36.1	Crude oil	Kelly et al., 2011
Proterozoic	588	-35.6	Crude oil	Kelly et al., 2011
Proterozoic	588	-35.1	Crude oil	Kelly et al., 2011
Proterozoic	588	-35.3	Crude oil	Kelly et al., 2011
Proterozoic	588	-35	Crude oil	Kelly et al., 2011
Proterozoic	588	-35.3	Crude oil	Kelly et al., 2011
Proterozoic	588	-34.4	Crude oil	Kelly et al., 2011
Proterozoic	588	-34.6	Crude oil	Kelly et al., 2011
Proterozoic	588	-35.2	Crude oil	Kelly et al., 2011
Proterozoic	588	-35.3	Crude oil	Kelly et al., 2011
Proterozoic	588	-35.4	Crude oil	Kelly et al., 2011
Proterozoic	591.668	-34.7898	Crude oil C15 saturates	Andrusevich et al., 1998
