# Supplementary material for: The geologic history of marine dissolved organic carbon from iron oxides
Source: Nature. 2025 Aug 13;644(8078):945–51. doi: 10.1038/s41586-025-09383-3 (PMC12390840; doi:10.1038/s41586-025-09383-3)
Supplement: Supplementary file 8 — Compilation of kerogen δ13C values. [file 41586_2025_9383_MOESM8_ESM.xlsx]

## Sheet: Dataset S6
Geological period	Age (Ma)	δ13C (‰, VPDB)	Reference
Quaternary	0	-21	Peters et al., 1978
Quaternary	0	-21.7	Peters et al., 1978
Quaternary	0	-21.1	Peters et al., 1978
Quaternary	0	-22.9	Peters et al., 1978
Quaternary	0	-21.5	Peters et al., 1978
Quaternary	0	-24	Peters et al., 1978
Quaternary	0	-23.9	Peters et al., 1978
Quaternary	0	-24.1	Peters et al., 1978
Quaternary	0	-25.6	Peters et al., 1978
Quaternary	0	-24.4	Peters et al., 1978
Quaternary	0	-22	Peters et al., 1978
Quaternary	0	-22.3	Peters et al., 1978
Quaternary	0	-22.6	Peters et al., 1978
Quaternary	0	-22	Peters et al., 1978
Quaternary	0	-23	Peters et al., 1978
Quaternary	0	-21.7	Peters et al., 1978
Quaternary	0	-24.3	Peters et al., 1978
Quaternary	0	-24.8	Peters et al., 1978
Quaternary	0	-21.4	Peters et al., 1978
Quaternary	0	-23.7	Peters et al., 1978
Quaternary	0	-21.6	Peters et al., 1978
Quaternary	0	-22.7	Peters et al., 1978
Quaternary	0	-23.4	Peters et al., 1978
Quaternary	0	-22.8	Peters et al., 1978
Quaternary	0	-23.6	Peters et al., 1978
Quaternary	0	-22	Peters et al., 1978
Quaternary	0	-21.6	Peters et al., 1978
Quaternary	0	-20.6	Peters et al., 1978
Quaternary	0	-21.8	Peters et al., 1978
Quaternary	0	-21.7	Peters et al., 1978
Quaternary	0	-24.7	Peters et al., 1978
Quaternary	0	-23.4	Peters et al., 1978
Quaternary	0	-22.8	Peters et al., 1978
Quaternary	0	-22.3	Peters et al., 1978
Quaternary	0	-22.1	Peters et al., 1978
Quaternary	0	-21.4	Peters et al., 1978
Quaternary	0	-21	Peters et al., 1978
Quaternary	0	-21.7	Peters et al., 1978
Quaternary	0	-21.2	Peters et al., 1978
Quaternary	0	-21.9	Peters et al., 1978
Quaternary	0	-22.3	Peters et al., 1978
Quaternary	0	-24.5	Peters et al., 1978
Quaternary	0	-22	Peters et al., 1978
Quaternary	0	-22	Peters et al., 1978
Quaternary	0	-23.4	Peters et al., 1978
Quaternary	0	-22.2	Peters et al., 1978
Quaternary	0	-16.6	Hatcher et al., 1983
Quaternary	0	-15.2	Hatcher et al., 1983
Quaternary	0	-17.2	Hatcher et al., 1983
Quaternary	0	-19.5	Hatcher et al., 1983
Quaternary	0	-18.4	Hatcher et al., 1983
Quaternary	0	-17.5	Hatcher et al., 1983
Quaternary	0	-17.7	Hatcher et al., 1983
Quaternary	0	-20.2	Hatcher et al., 1983
Quaternary	0	-22.3	Hatcher et al., 1983
Quaternary	0	-21.1	Hatcher et al., 1983
Quaternary	0	-23.9617	Oehler et al., 1972
Quaternary	0	-16.4733	Behrens and Frishman, 1971
Quaternary	0	-16.7922	Behrens and Frishman, 1971
Quaternary	0	-17.2853	Behrens and Frishman, 1971
Quaternary	0	-18.1931	Behrens and Frishman, 1971
Quaternary	0	-16.7975	Behrens and Frishman, 1971
Quaternary	0	-16.3065	Behrens and Frishman, 1971
Quaternary	0	-16.9277	Behrens and Frishman, 1971
Quaternary	0	-15.7257	Behrens and Frishman, 1971
Quaternary	0	-15.6269	Behrens and Frishman, 1971
Quaternary	0	-15.6281	Behrens and Frishman, 1971
Quaternary	0	-14.8175	Behrens and Frishman, 1971
Quaternary	0	-14.6469	Behrens and Frishman, 1971
Quaternary	0	-13.9705	Behrens and Frishman, 1971
Quaternary	0	-14.2915	Behrens and Frishman, 1971
Quaternary	0	-14.7805	Behrens and Frishman, 1971
Quaternary	0	-15.9458	Behrens and Frishman, 1971
Quaternary	0	-15.9471	Behrens and Frishman, 1971
Quaternary	0	-15.3323	Behrens and Frishman, 1971
Quaternary	0	-14.9659	Behrens and Frishman, 1971
Quaternary	0	-15.0441	Behrens and Frishman, 1971
Quaternary	0	-14.4189	Behrens and Frishman, 1971
Quaternary	0	-13.9097	Behrens and Frishman, 1971
Quaternary	0	-15.4069	Behrens and Frishman, 1971
Quaternary	0	-13.0447	Behrens and Frishman, 1971
Quaternary	0	-13.9537	Behrens and Frishman, 1971
Quaternary	0	-14.8138	Behrens and Frishman, 1971
Quaternary	0	-15.1912	Behrens and Frishman, 1971
Neogene	4.2	-30.7	Lewan et al., 1986
Neogene	4.2	-26.6	Lewan et al., 1986
Neogene	4.2	-21.3	Lewan et al., 1986
Neogene	10.95	-21.8	Lewan et al., 1986
Neogene	16.925	-22.9	Lewan et al., 1986
Neogene	16.925	-22.1	Lewan et al., 1986
Neogene	16.925	-22.4	Lewan et al., 1986
Neogene	16.925	-27.2	Lewan et al., 1986
Neogene	16.925	-21.6	Lewan et al., 1986
Paleogene	24.75	-23.4	Lewan et al., 1986
Paleogene	33.3	-27.6	Lewan et al., 1986
Paleogene	38.4	-28.1	Lewan et al., 1986
Paleogene	47.85	-26.4	Lewan et al., 1986
Paleogene	47.85	-28.6	Lewan et al., 1986
Paleogene	47.85	-30.2	Lewan et al., 1986
Paleogene	47.85	-32.3	Lewan et al., 1986
Paleogene	47.85	-28.8	Lewan et al., 1986
Paleogene	58.3	-25.1	Lewan et al., 1986
Cretaceous	77.85	-25.1	Whittaker and Kyser, 1990
Cretaceous	77.85	-25.2	Whittaker and Kyser, 1990
Cretaceous	77.85	-25.1	Whittaker and Kyser, 1990
Cretaceous	77.85	-25.6	Whittaker and Kyser, 1990
Cretaceous	77.85	-25.5	Whittaker and Kyser, 1990
Cretaceous	77.85	-25.6	Whittaker and Kyser, 1990
Cretaceous	77.85	-25.4	Whittaker and Kyser, 1990
Cretaceous	77.85	-25.2	Whittaker and Kyser, 1990
Cretaceous	77.85	-25.8	Whittaker and Kyser, 1990
Cretaceous	77.85	-26.2	Whittaker and Kyser, 1990
Cretaceous	77.85	-26	Whittaker and Kyser, 1990
Cretaceous	77.85	-25.6	Whittaker and Kyser, 1990
Cretaceous	77.85	-26.6	Whittaker and Kyser, 1990
Cretaceous	77.85	-25.8	Whittaker and Kyser, 1990
Cretaceous	77.85	-25.6	Whittaker and Kyser, 1990
Cretaceous	77.85	-25.5	Whittaker and Kyser, 1990
Cretaceous	77.85	-25.9	Whittaker and Kyser, 1990
Cretaceous	77.85	-26.1	Whittaker and Kyser, 1990
Cretaceous	77.85	-26.8	Whittaker and Kyser, 1990
Cretaceous	77.85	-25	Whittaker and Kyser, 1990
Cretaceous	77.85	-25.4	Whittaker and Kyser, 1990
Cretaceous	77.85	-25.7	Whittaker and Kyser, 1990
Cretaceous	77.85	-25.8	Whittaker and Kyser, 1990
Cretaceous	77.85	-26.3	Whittaker and Kyser, 1990
Cretaceous	77.85	-25.9	Whittaker and Kyser, 1990
Cretaceous	77.85	-25.6	Whittaker and Kyser, 1990
Cretaceous	77.85	-26.5	Whittaker and Kyser, 1990
Cretaceous	77.85	-26.2	Whittaker and Kyser, 1990
Cretaceous	77.85	-26.8	Whittaker and Kyser, 1990
Cretaceous	77.85	-25.8	Whittaker and Kyser, 1990
Cretaceous	77.85	-26.2	Whittaker and Kyser, 1990
Cretaceous	77.85	-26.2	Whittaker and Kyser, 1990
Cretaceous	77.85	-26.1	Whittaker and Kyser, 1990
Cretaceous	77.85	-26.2	Whittaker and Kyser, 1990
Cretaceous	83.4	-28.3	Lewan et al., 1986
Cretaceous	83.4	-27.4	Lewan et al., 1986
Cretaceous	83.4	-27.5	Lewan et al., 1986
Cretaceous	83.4	-26.7	Lewan et al., 1986
Cretaceous	83.4	-27.4	Lewan et al., 1986
Cretaceous	129.75	-25.7	Hirner and Lyon, 1989
Cretaceous	129.75	-25.4	Hirner and Lyon, 1989
Cretaceous	129.75	-25.8	Hirner and Lyon, 1989
Cretaceous	129.75	-26	Hirner and Lyon, 1989
Cretaceous	129.75	-25.2	Hirner and Lyon, 1989
Cretaceous	129.75	-25.9	Hirner and Lyon, 1989
Cretaceous	129.75	-26	Hirner and Lyon, 1989
Cretaceous	129.75	-25.9	Hirner and Lyon, 1989
Cretaceous	129.75	-24.8	Hirner and Lyon, 1989
Cretaceous	129.75	-25.6	Hirner and Lyon, 1989
Cretaceous	129.75	-25.3	Hirner and Lyon, 1989
Cretaceous	129.75	-24.8	Hirner and Lyon, 1989
Cretaceous	129.75	-25	Hirner and Lyon, 1989
Cretaceous	129.75	-24.1	Hirner and Lyon, 1989
Cretaceous	129.75	-25.9	Hirner and Lyon, 1989
Cretaceous	129.75	-24.3	Hirner and Lyon, 1989
Cretaceous	129.75	-25.6	Hirner and Lyon, 1989
Cretaceous	129.75	-25.5	Hirner and Lyon, 1989
Cretaceous	129.75	-24.4	Hirner and Lyon, 1989
Cretaceous	129.75	-25.5	Hirner and Lyon, 1989
Cretaceous	129.75	-26.2	Hirner and Lyon, 1989
Cretaceous	129.75	-21.2	Hirner and Lyon, 1989
Cretaceous	129.75	-26.5	Hirner and Lyon, 1989
Cretaceous	129.75	-26.4	Hirner and Lyon, 1989
Cretaceous	129.75	-26.3	Hirner and Lyon, 1989
Cretaceous	129.75	-25.1	Hirner and Lyon, 1989
Cretaceous	129.75	-23.7	Hirner and Lyon, 1989
Jurassic	160.65	-21.8	Lewan et al., 1986
Jurassic	160.65	-28.3	Lewan et al., 1986
Jurassic	160.65	-32.3	Lewan et al., 1986
Jurassic	185.939	-23.2137	Oehler et al., 1972
Triassic	220	-27.2	Lewan et al., 1986
Triassic	220	-26.9	Lewan et al., 1986
Permian	275.275	-29.3	Lewan et al., 1986
Permian	275.275	-28.8	Lewan et al., 1986
Permian	275.275	-27	Lewan et al., 1986
Permian	275.275	-30.5	Lewan et al., 1986
Permian	275.275	-26.9	Lewan et al., 1986
Carboniferous	310.95	-27.4	Lewan et al., 1986
Carboniferous	310.95	-29	Lewan et al., 1986
Carboniferous	310.95	-27.7	Lewan et al., 1986
Carboniferous	345.85	-29.8	Lewan et al., 1986
Carboniferous	345.85	-26.7	Lewan et al., 1986
Carboniferous	345.85	-28.7	Lewan et al., 1986
Carboniferous	345.85	-29	Lewan et al., 1986
Carboniferous	345.85	-30.6	Lewan et al., 1986
Carboniferous	345.85	-29.8	Lewan et al., 1986
Devonian	360.368	-23.9497	Oehler et al., 1972
Devonian	390.9	-28.8	Lewan et al., 1986
Devonian	390.9	-28.9	Lewan et al., 1986
Devonian	390.9	-29.2	Lewan et al., 1986
Devonian	390.9	-30.3	Lewan et al., 1986
Devonian	390.9	-28.7	Lewan et al., 1986
Devonian	390.9	-28.9	Lewan et al., 1986
Devonian	406	-29.4	Lewan et al., 1986
Silurian	433.2	-29.1	Lewan et al., 1986
Silurian	436.507	-35.8153	Oehler et al. (1972)
Ordovician	464.6	-29.3	Lewan et al., 1986
Ordovician	464.6	-26.7	Lewan et al., 1986
Ordovician	464.6	-30.2	Lewan et al., 1986
Ordovician	464.6	-28.4	Lewan et al., 1986
Ordovician	464.6	-29.6	Lewan et al., 1986
Ordovician	464.6	-28.3	Lewan et al., 1986
Ordovician	475	-28.2	Strauss and Moore, 1992
Ordovician	475	-29.3	Strauss and Moore, 1992
Cambrian	491	-29.05	Ahlberg et al., 2009
Cambrian	491	-29.25	Ahlberg et al., 2009
Cambrian	491	-29.32	Ahlberg et al., 2009
Cambrian	491	-29.3	Ahlberg et al., 2009
Cambrian	491	-28.92	Ahlberg et al., 2009
Cambrian	491	-29.26	Ahlberg et al., 2009
Cambrian	491	-29.3	Ahlberg et al., 2009
Cambrian	491	-29.31	Ahlberg et al., 2009
Cambrian	491	-29.16	Ahlberg et al., 2009
Cambrian	491	-29.09	Ahlberg et al., 2009
Cambrian	491	-29.55	Ahlberg et al., 2009
Cambrian	491	-29.03	Ahlberg et al., 2009
Cambrian	491	-29	Ahlberg et al., 2009
Cambrian	491	-29.08	Ahlberg et al., 2009
Cambrian	491	-28.82	Ahlberg et al., 2009
Cambrian	491	-28.78	Ahlberg et al., 2009
Cambrian	491	-28.52	Ahlberg et al., 2009
Cambrian	491	-28.71	Ahlberg et al., 2009
Cambrian	491	-28.23	Ahlberg et al., 2009
Cambrian	491	-28.32	Ahlberg et al., 2009
Cambrian	491	-28.17	Ahlberg et al., 2009
Cambrian	491	-28.01	Ahlberg et al., 2009
Cambrian	491	-28.01	Ahlberg et al., 2009
Cambrian	491	-28.15	Ahlberg et al., 2009
Cambrian	491	-28.16	Ahlberg et al., 2009
Cambrian	491	-28.19	Ahlberg et al., 2009
Cambrian	491	-27.99	Ahlberg et al., 2009
Cambrian	491	-28.31	Ahlberg et al., 2009
Cambrian	491	-28.36	Ahlberg et al., 2009
Cambrian	491	-28.42	Ahlberg et al., 2009
Cambrian	491	-28.68	Ahlberg et al., 2009
Cambrian	496	-28.93	Buchardt et al., 1986
Cambrian	496	-28.88	Buchardt et al., 1986
Cambrian	496	-28.36	Buchardt et al., 1986
Cambrian	496	-28.86	Buchardt et al., 1986
Cambrian	496	-29.49	Buchardt et al., 1986
Cambrian	496	-29.02	Buchardt et al., 1986
Cambrian	496	-29.16	Buchardt et al., 1986
Cambrian	496	-29.13	Buchardt et al., 1986
Cambrian	496	-29.23	Buchardt et al., 1986
Cambrian	496	-29.32	Buchardt et al., 1986
Cambrian	496	-29.32	Buchardt et al., 1986
Cambrian	496	-28.98	Buchardt et al., 1986
Cambrian	501	-31.1452	Liu et al., 2017
Cambrian	501	-30.8142	Liu et al., 2017
Cambrian	501	-30.3822	Liu et al., 2017
Cambrian	501	-29.9034	Liu et al., 2017
Cambrian	501	-29.9034	Liu et al., 2017
Cambrian	501	-30.3361	Liu et al., 2017
Cambrian	501	-30.5293	Liu et al., 2017
Cambrian	501	-29.5643	Liu et al., 2017
Cambrian	501	-30.1461	Liu et al., 2017
Cambrian	501	-30.3911	Liu et al., 2017
Cambrian	501	-31.2586	Liu et al., 2017
Cambrian	501	-31.4521	Liu et al., 2017
Cambrian	501	-29.8705	Liu et al., 2017
Cambrian	501	-29.8178	Liu et al., 2017
Cambrian	501	-28.4215	Liu et al., 2017
Cambrian	501	-28.4146	Liu et al., 2017
Cambrian	501	-28.799	Liu et al., 2017
Cambrian	501	-28.991	Liu et al., 2017
Cambrian	501	-29.1841	Liu et al., 2017
Cambrian	501	-29.4741	Liu et al., 2017
Cambrian	510	-27.7	Strauss and Moore, 1992
Cambrian	512	-32.0471	Liu et al., 2017
Cambrian	512	-32.0978	Liu et al., 2017
Cambrian	512	-31.6236	Liu et al., 2017
Cambrian	512	-31.3329	Liu et al., 2017
Cambrian	512	-30.8556	Liu et al., 2017
Cambrian	512	-31.0983	Liu et al., 2017
Cambrian	515	-28.98	Ahlberg et al., 2009
Cambrian	515	-29.05	Ahlberg et al., 2009
Cambrian	515	-29.04	Ahlberg et al., 2009
Cambrian	515	-28.87	Ahlberg et al., 2009
Cambrian	515	-29.14	Ahlberg et al., 2009
Cambrian	515	-29.28	Ahlberg et al., 2009
Cambrian	515	-29.21	Ahlberg et al., 2009
Cambrian	515	-29.27	Ahlberg et al., 2009
Cambrian	515	-29.23	Ahlberg et al., 2009
Cambrian	515	-29.48	Ahlberg et al., 2009
Cambrian	515	-29.53	Ahlberg et al., 2009
Cambrian	515	-29.64	Ahlberg et al., 2009
Cambrian	515	-29.43	Ahlberg et al., 2009
Cambrian	515	-29.63	Ahlberg et al., 2009
Cambrian	515	-29.58	Ahlberg et al., 2009
Cambrian	515	-29.61	Ahlberg et al., 2009
Cambrian	515	-29.74	Ahlberg et al., 2009
Cambrian	515	-29.68	Ahlberg et al., 2009
Cambrian	515	-29.96	Ahlberg et al., 2009
Cambrian	515	-30.15	Ahlberg et al., 2009
Cambrian	515	-30.03	Ahlberg et al., 2009
Cambrian	515	-30.04	Ahlberg et al., 2009
Cambrian	515	-29.81	Ahlberg et al., 2009
Cambrian	515	-29.94	Ahlberg et al., 2009
Cambrian	515	-30.24	Ahlberg et al., 2009
Cambrian	515	-30.45	Ahlberg et al., 2009
Cambrian	515	-30.3	Ahlberg et al., 2009
Cambrian	515.65	-33	Parfenova et al., 2010
Cambrian	515.65	-37	Grosjean et al., 2009
Cambrian	515.65	-32.5	Logan et al., 1997
Cambrian	515.65	-31	Buchardt et al., 1986
Cambrian	515.65	-34	Guo et al., 2011
Cambrian	515.65	-36	Wang, 2012
Cambrian	515.65	-27	Parfenova et al., 2010
Cambrian	515.65	-34	Grosjean et al., 2009
Cambrian	515.65	-26.7	Logan et al., 1997
Cambrian	515.65	-27	Buchardt et al., 1986
Cambrian	515.65	-29	Guo et al., 2011
Cambrian	515.65	-26	Wang, 2012
Cambrian	515.65	-34.9021	He et al., 2022
Cambrian	515.65	-35.2378	He et al., 2022
Cambrian	515.65	-35.8462	He et al., 2022
Cambrian	515.65	-36.2238	He et al., 2022
Cambrian	515.65	-36.2028	He et al., 2022
Cambrian	515.65	-36.6643	He et al., 2022
Cambrian	515.65	-36.3916	He et al., 2022
Cambrian	515.65	-35.6573	He et al., 2022
Cambrian	515.65	-35.3636	He et al., 2022
Cambrian	515.65	-35.007	He et al., 2022
Cambrian	515.65	-35.2587	He et al., 2022
Cambrian	515.65	-34.9021	He et al., 2022
Cambrian	515.65	-34.7762	He et al., 2022
Cambrian	515.65	-28.3	Lewan et al., 1986
Cambrian	515.65	-21.8	Lewan et al., 1986
Cambrian	530	-27.8	Logan et al., 1997
Cambrian	530	-29.6	Logan et al., 1997
Cambrian	530	-29.9	Logan et al., 1997
Cambrian	530	-30.3	Logan et al., 1997
Cambrian	530	-31	Logan et al., 1997
Cambrian	530	-26.7	Logan et al., 1997
Cambrian	530	-32.5	Logan et al., 1997
Cambrian	530	-29.4	Logan et al., 1997
Cambrian	530	-30.5	Logan et al., 1997
Cambrian	530	-28.7	Logan et al., 1997
Cambrian	530	-29.8	Logan et al., 1997
Cambrian	530	-29.5	Logan et al., 1997
Proterozoic	542	-34.6	Li et al., 2022
Proterozoic	542	-34.4	Li et al., 2022
Proterozoic	542	-34.5	Li et al., 2022
Proterozoic	542	-34.6	Li et al., 2022
Proterozoic	542	-34.3	Li et al., 2022
Proterozoic	542	-33.9	Li et al., 2022
Proterozoic	542	-32.9	Li et al., 2022
Proterozoic	542	-35.3	Li et al., 2022
Proterozoic	542	-36.4	Li et al., 2022
Proterozoic	542	-34.6	Li et al., 2022
Proterozoic	542	-34.4	Li et al., 2022
Proterozoic	542	-33.3	Li et al., 2022
Proterozoic	542	-33.9	Li et al., 2022
Proterozoic	542	-35.2	Li et al., 2022
Proterozoic	542	-34	Li et al., 2022
Proterozoic	542	-33.4	Li et al., 2022
Proterozoic	542	-33.4	Li et al., 2022
Proterozoic	542	-35.9	Li et al., 2022
Proterozoic	542	-36.8	Li et al., 2022
Proterozoic	542	-36.5	Li et al., 2022
Proterozoic	542	-34.8	Li et al., 2022
Proterozoic	542	-34.6	Li et al., 2022
Proterozoic	542	-36	Li et al., 2022
Proterozoic	542	-36.3	Li et al., 2022
Proterozoic	542	-36.9	Li et al., 2022
Proterozoic	542	-37.1	Li et al., 2022
Proterozoic	542	-35.5	Li et al., 2022
Proterozoic	542	-35.5	Li et al., 2022
Proterozoic	542	-34.7	Li et al., 2022
Proterozoic	542	-35.9	Li et al., 2022
Proterozoic	542	-35.6	Li et al., 2022
Proterozoic	542	-35.4	Li et al., 2022
Proterozoic	542	-36	Wang et al., 2015
Proterozoic	542	-35.3	Wang et al., 2015
Proterozoic	542	-35.2	Wang et al., 2015
Proterozoic	542	-35	Wang et al., 2015
Proterozoic	542	-35	Wang et al., 2015
Proterozoic	542	-34.9	Wang et al., 2015
Proterozoic	542	-35.2	Wang et al., 2015
Proterozoic	542	-34.8	Wang et al., 2015
Proterozoic	542	-33.9	Wang et al., 2015
Proterozoic	542	-34.8	Wang et al., 2015
Proterozoic	542	-34.2	Wang et al., 2015
Proterozoic	542	-33.4	Wang et al., 2015
Proterozoic	542	-32.3	Wang et al., 2015
Proterozoic	542	-33.1	Wang et al., 2015
Proterozoic	542	-33.3	Wang et al., 2015
Proterozoic	542	-33.1	Wang et al., 2015
Proterozoic	542	-33.2	Wang et al., 2015
Proterozoic	542	-27.9	Wang et al., 2015
Proterozoic	542	-33.1	Wang et al., 2015
Proterozoic	542	-29.2	Wang et al., 2015
Proterozoic	542	-34.1	Wang et al., 2015
Proterozoic	542	-31.3	Wang et al., 2015
Proterozoic	542	-29.3	Wang et al., 2015
Proterozoic	542	-33.3	Wang et al., 2015
Proterozoic	542	-28.9	Wang et al., 2015
Proterozoic	542	-32	Wang et al., 2015
Proterozoic	542	-28.8	Wang et al., 2015
Proterozoic	542	-33.4	Wang et al., 2015
Proterozoic	542	-33.3	Wang et al., 2015
Proterozoic	542	-33.4	Wang et al., 2015
Proterozoic	542	-33.4	Wang et al., 2015
Proterozoic	542	-30.5	Wang et al., 2015
Proterozoic	542	-32.2	Wang et al., 2015
Proterozoic	542	-33.4	Wang et al., 2015
Proterozoic	542	-32.7	Wang et al., 2015
Proterozoic	542	-31.7	Wang et al., 2015
Proterozoic	542	-31.7	Wang et al., 2015
Proterozoic	542	-31.1	Wang et al., 2015
Proterozoic	542	-31.7	Wang et al., 2015
Proterozoic	542	-31.9	Wang et al., 2015
Proterozoic	542	-31.8	Wang et al., 2015
Proterozoic	542	-32.1	Wang et al., 2015
Proterozoic	542	-31.4	Wang et al., 2015
Proterozoic	542	-32	Wang et al., 2015
Proterozoic	542	-31.6	Wang et al., 2015
Proterozoic	542	-31.3	Wang et al., 2015
Proterozoic	542	-30.3	Wang et al., 2015
Proterozoic	542	-30.3	Wang et al., 2015
Proterozoic	542	-31	Wang et al., 2015
Proterozoic	542	-30.6	Wang et al., 2015
Proterozoic	542	-30.3	Wang et al., 2015
Proterozoic	542	-31.2	Wang et al., 2015
Proterozoic	542	-29	Wang et al., 2015
Proterozoic	542	-29.5	Wang et al., 2015
Proterozoic	542	-31	Wang et al., 2015
Proterozoic	542	-31.4	Wang et al., 2015
Proterozoic	542	-32	Wang et al., 2015
Proterozoic	542	-35.1	Wang et al., 2015
Proterozoic	542	-31.7	Wang et al., 2015
Proterozoic	542	-29.3	Wang et al., 2015
Proterozoic	542	-32.1	Wang et al., 2015
Proterozoic	542	-29	Wang et al., 2015
Proterozoic	542	-28.2	Wang et al., 2015
Proterozoic	542	-27.5	Wang et al., 2015
Proterozoic	542	-27.9	Wang et al., 2015
Proterozoic	542	-27.2	Wang et al., 2015
Proterozoic	542	-28.8	Wang et al., 2015
Proterozoic	542	-29.3	Wang et al., 2015
Proterozoic	542	-29.2	Wang et al., 2015
Proterozoic	542	-29.1	Wang et al., 2015
Proterozoic	542	-29.1	Wang et al., 2015
Proterozoic	542	-28.8	Wang et al., 2015
Proterozoic	542	-29.1	Wang et al., 2015
Proterozoic	542	-29.6	Wang et al., 2015
Proterozoic	542	-29.3	Wang et al., 2015
Proterozoic	542	-29.7	Wang et al., 2015
Proterozoic	542	-29.2	Wang et al., 2015
Proterozoic	542	-29.9	Wang et al., 2015
Proterozoic	542	-29.5	Wang et al., 2015
Proterozoic	542	-30.2	Wang et al., 2015
Proterozoic	542	-29.8	Wang et al., 2015
Proterozoic	542	-30.3	Wang et al., 2015
Proterozoic	542	-29.8	Wang et al., 2015
Proterozoic	542	-29.7	Wang et al., 2015
Proterozoic	542	-30.2	Wang et al., 2015
Proterozoic	542	-30.5	Wang et al., 2015
Proterozoic	542	-30.2	Wang et al., 2015
Proterozoic	542	-29.9	Wang et al., 2015
Proterozoic	542	-30.5	Wang et al., 2015
Proterozoic	542	-30.3	Wang et al., 2015
Proterozoic	542	-30.3	Wang et al., 2015
Proterozoic	542	-29.8	Wang et al., 2015
Proterozoic	542	-28.8	Wang et al., 2015
Proterozoic	542	-29.4	Wang et al., 2015
Proterozoic	542	-28.7	Wang et al., 2015
Proterozoic	542	-29.7	Wang et al., 2015
Proterozoic	542	-29.8	Wang et al., 2015
Proterozoic	542	-30.2	Wang et al., 2015
Proterozoic	542	-30.4	Wang et al., 2015
Proterozoic	542	-29.9	Wang et al., 2015
Proterozoic	542	-30.5	Wang et al., 2015
Proterozoic	542	-30.6	Wang et al., 2015
Proterozoic	542	-30.4	Wang et al., 2015
Proterozoic	542	-30.7	Wang et al., 2015
Proterozoic	542	-30.7	Wang et al., 2015
Proterozoic	542	-30.5	Wang et al., 2015
Proterozoic	542	-30.6	Wang et al., 2015
Proterozoic	542	-30.3	Wang et al., 2015
Proterozoic	542	-30.6	Wang et al., 2015
Proterozoic	542	-30.3	Wang et al., 2015
Proterozoic	542	-30.7	Wang et al., 2015
Proterozoic	542	-35.7	Liu et al., 2015
Proterozoic	542	-35.1	Liu et al., 2015
Proterozoic	542	-35.4	Liu et al., 2015
Proterozoic	542	-35.7	Liu et al., 2015
Proterozoic	542	-35.4	Liu et al., 2015
Proterozoic	542	-35.3	Liu et al., 2015
Proterozoic	542	-36.1	Liu et al., 2015
Proterozoic	542	-36.4	Liu et al., 2015
Proterozoic	542	-36.4	Liu et al., 2015
Proterozoic	542	-36.5	Liu et al., 2015
Proterozoic	542	-36.5	Liu et al., 2015
Proterozoic	542	-36.3	Liu et al., 2015
Proterozoic	542	-35.7	Liu et al., 2015
Proterozoic	542	-36.4	Liu et al., 2015
Proterozoic	542	-36.5	Liu et al., 2015
Proterozoic	542	-36.9	Liu et al., 2015
Proterozoic	542	-36.4	Liu et al., 2015
Proterozoic	542	-37.2	Liu et al., 2015
Proterozoic	542	-36.9	Liu et al., 2015
Proterozoic	542	-37	Liu et al., 2015
Proterozoic	542	-37.1	Liu et al., 2015
Proterozoic	542	-37.3	Liu et al., 2015
Proterozoic	542	-38.1	Liu et al., 2015
Proterozoic	542	-38.7	Liu et al., 2015
Proterozoic	542	-38.5	Liu et al., 2015
Proterozoic	542	-38.7	Liu et al., 2015
Proterozoic	542	-38.5	Liu et al., 2015
Proterozoic	542	-37.9	Liu et al., 2015
Proterozoic	542	-37.3	Liu et al., 2015
Proterozoic	542	-32.5712	Liu et al., 2017
Proterozoic	542	-33.1561	Liu et al., 2017
Proterozoic	542	-32.7764	Liu et al., 2017
Proterozoic	542	-32.2499	Liu et al., 2017
Proterozoic	542	-32.4357	Liu et al., 2017
Proterozoic	542	-32.9161	Liu et al., 2017
Proterozoic	542	-32.865	Liu et al., 2017
Proterozoic	542	-32.8155	Liu et al., 2017
Proterozoic	542	-32.5275	Liu et al., 2017
Proterozoic	542	-32.4818	Liu et al., 2017
Proterozoic	542	-31.6108	Liu et al., 2017
Proterozoic	542	-31.9012	Liu et al., 2017
Proterozoic	542	-32.0939	Liu et al., 2017
Proterozoic	542	-31.5203	Liu et al., 2017
Proterozoic	542	-31.617	Liu et al., 2017
Proterozoic	550	-36.2	Strauss and Moore, 1992
Proterozoic	552.206	-29.1357	Oehler et al., 1972
Proterozoic	555	-30	Logan et al., 1997
Proterozoic	555	-30.5	Logan et al., 1997
Proterozoic	555	-26.5	Logan et al., 1997
Proterozoic	555	-28.3	Logan et al., 1997
Proterozoic	555	-31.8	Logan et al., 1997
Proterozoic	555	-32	Wang et al., 2019
Proterozoic	555	-32.5	Wang et al., 2019
Proterozoic	555	-32.6	Wang et al., 2019
Proterozoic	555	-32.3	Wang et al., 2019
Proterozoic	555	-32.2	Wang et al., 2019
Proterozoic	555	-31.7	Wang et al., 2019
Proterozoic	555	-35	Wang et al., 2019
Proterozoic	555	-33.6	Wang et al., 2019
Proterozoic	555	-33.9	Wang et al., 2019
Proterozoic	555	-33.8	Wang et al., 2019
Proterozoic	555	-34.7	Wang et al., 2019
Proterozoic	555	-35.6	Wang et al., 2019
Proterozoic	555	-30.5	Wang et al., 2019
Proterozoic	555	-32.7	Wang et al., 2019
Proterozoic	555	-31.3	Wang et al., 2019
Proterozoic	555	-32.3	Wang et al., 2019
Proterozoic	555	-32.7	Wang et al., 2019
Proterozoic	555	-30.7	Wang et al., 2019
Proterozoic	555	-30.7	Wang et al., 2019
Proterozoic	555	-31.4	Wang et al., 2019
Proterozoic	555	-30.9	Wang et al., 2019
Proterozoic	555	-30.5	Wang et al., 2019
Proterozoic	555	-30.8	Wang et al., 2019
Proterozoic	555	-30.8	Wang et al., 2019
Proterozoic	560	-32.2	Strauss and Moore, 1992
Proterozoic	580	-31.8938	Grey et al., 2003
Proterozoic	580	-31.6283	Grey et al., 2003
Proterozoic	580	-31.3628	Grey et al., 2003
Proterozoic	580	-31.1504	Grey et al., 2003
Proterozoic	580	-30.9381	Grey et al., 2003
Proterozoic	580	-30.7257	Grey et al., 2003
Proterozoic	580	-30.6195	Grey et al., 2003
Proterozoic	580	-30.4602	Grey et al., 2003
Proterozoic	580	-30.354	Grey et al., 2003
Proterozoic	580	-30.0354	Grey et al., 2003
Proterozoic	580	-29.8761	Grey et al., 2003
Proterozoic	580	-29.7699	Grey et al., 2003
Proterozoic	580	-29.6106	Grey et al., 2003
Proterozoic	580	-27.7522	Grey et al., 2003
Proterozoic	580	-27.7522	Grey et al., 2003
Proterozoic	580	-28.0708	Grey et al., 2003
Proterozoic	580	-27.2212	Grey et al., 2003
Proterozoic	580	-26.9027	Grey et al., 2003
Proterozoic	580	-27.2743	Grey et al., 2003
Proterozoic	580	-27.4336	Grey et al., 2003
Proterozoic	580	-27.8584	Grey et al., 2003
Proterozoic	580	-27.3274	Grey et al., 2003
Proterozoic	580	-26.7965	Grey et al., 2003
Proterozoic	580	-26.9558	Grey et al., 2003
Proterozoic	580	-27.2212	Grey et al., 2003
Proterozoic	580	-27.115	Grey et al., 2003
Proterozoic	580	-27.2212	Grey et al., 2003
Proterozoic	580	-26.2655	Grey et al., 2003
Proterozoic	580	-26.3717	Grey et al., 2003
Proterozoic	580	-26.1062	Grey et al., 2003
Proterozoic	580	-27.3805	Grey et al., 2003
Proterozoic	580	-27.3805	Grey et al., 2003
Proterozoic	580	-27.5929	Grey et al., 2003
Proterozoic	580	-27.7522	Grey et al., 2003
Proterozoic	580	-27.8584	Grey et al., 2003
Proterozoic	580	-28.1239	Grey et al., 2003
Proterozoic	580	-28.1239	Grey et al., 2003
Proterozoic	580	-28.0177	Grey et al., 2003
Proterozoic	580	-28.2832	Grey et al., 2003
Proterozoic	580	-30.1947	Grey et al., 2003
Proterozoic	580	-29.3982	Grey et al., 2003
Proterozoic	580	-29.292	Grey et al., 2003
Proterozoic	580	-29.0796	Grey et al., 2003
Proterozoic	580	-29.1327	Grey et al., 2003
Proterozoic	580	-28.8142	Grey et al., 2003
Proterozoic	580	-28.6549	Grey et al., 2003
Proterozoic	580	-28.4956	Grey et al., 2003
Proterozoic	580	-29.1327	Grey et al., 2003
Proterozoic	580	-29.3451	Grey et al., 2003
Proterozoic	580	-29.292	Grey et al., 2003
Proterozoic	580	-29.5044	Grey et al., 2003
Proterozoic	580	-29.5575	Grey et al., 2003
Proterozoic	580	-30.0885	Grey et al., 2003
Proterozoic	589.118	-30.7828	Oehler et al. (1972)
Proterozoic	600	-24.3	Strauss and Moore, 1992
Proterozoic	600	-27.5	Strauss and Moore, 1992
Proterozoic	600	-28.3	Strauss and Moore, 1992
Proterozoic	600	-32.6	Strauss and Moore, 1992
Proterozoic	610	-30	Strauss and Moore, 1992
Proterozoic	610	-27.8	Strauss and Moore, 1992
Proterozoic	620	-27.1	Strauss and Moore, 1992
Proterozoic	620	-27.6	Strauss and Moore, 1992
Proterozoic	620	-36.4	Strauss and Moore, 1992
Proterozoic	620	-37.1	Strauss and Moore, 1992
Proterozoic	620	-31	Strauss and Moore, 1992
Proterozoic	630	-25.7	Strauss and Moore, 1992
Proterozoic	630	-26	Strauss and Moore, 1992
Proterozoic	640	-31.2	Strauss and Moore, 1992
Proterozoic	640	-29.5	Strauss and Moore, 1992
Proterozoic	650	-30	Strauss and Moore, 1992
Proterozoic	650	-29	Strauss and Moore, 1992
Proterozoic	650	-28.9	Strauss and Moore, 1992
Proterozoic	675	-25.7	Strauss and Moore, 1992
Proterozoic	680	-28.3	Logan et al., 1997
Proterozoic	680	-30	Logan et al., 1997
Proterozoic	680	-31.1	Logan et al., 1997
Proterozoic	680	-31.3	Logan et al., 1997
Proterozoic	680	-31.5	Logan et al., 1997
Proterozoic	680	-33.3	Logan et al., 1997
Proterozoic	680	-31.2	Logan et al., 1997
Proterozoic	694.532	-31.0266	Oehler et al. (1972)
Proterozoic	700	-30	Beaumont et Robert, 1999
Proterozoic	700	-30.3	Beaumont et Robert, 1999
Proterozoic	700	-32.1	Strauss and Moore, 1992
Proterozoic	700	-26.7	Strauss and Moore, 1992
Proterozoic	700	-30	Strauss and Moore, 1992
Proterozoic	700	-32.2	Strauss and Moore, 1992
Proterozoic	740	-30.2	Strauss and Moore, 1992
Proterozoic	740	-30.6	Strauss and Moore, 1992
Proterozoic	740	-29.7	Strauss and Moore, 1992
Proterozoic	750	-31.1	Strauss and Moore, 1992
Proterozoic	750	-32.7	Strauss and Moore, 1992
Proterozoic	750	-33.9	Strauss and Moore, 1992
Proterozoic	750	-30.2	Strauss and Moore, 1992
Proterozoic	750	-27.1	Strauss and Moore, 1992
Proterozoic	750	-30.3	Strauss and Moore, 1992
Proterozoic	750	-31.1	Strauss and Moore, 1992
Proterozoic	750	-21.8	Strauss and Moore, 1992
Proterozoic	750	-23.9	Strauss and Moore, 1992
Proterozoic	750	-23.8	Strauss and Moore, 1992
Proterozoic	750	-24.9	Strauss and Moore, 1992
Proterozoic	750	-27.3	Strauss and Moore, 1992
Proterozoic	750	-27.2	Strauss and Moore, 1992
Proterozoic	750	-31.5	Strauss and Moore, 1992
Proterozoic	750	-31.3	Strauss and Moore, 1992
Proterozoic	750	-31.3	Strauss and Moore, 1992
Proterozoic	750	-28.9	Strauss and Moore, 1992
Proterozoic	750	-28.2	Strauss and Moore, 1992
Proterozoic	750	-25.1	Strauss and Moore, 1992
Proterozoic	750	-22.5	Strauss and Moore, 1992
Proterozoic	750	-23.5	Strauss and Moore, 1992
Proterozoic	760	-29.2	Strauss and Moore, 1992
Proterozoic	770	-29.1	Strauss and Moore, 1992
Proterozoic	770	-26.6	Strauss and Moore, 1992
Proterozoic	775	-28.7	Strauss and Moore, 1992
Proterozoic	800	-27	Beaumont et Robert, 1999
Proterozoic	800	-27	Strauss and Moore, 1992
Proterozoic	800	-23.6	Strauss and Moore, 1992
Proterozoic	800	-24.2	Strauss and Moore, 1992
Proterozoic	800	-26.1	Strauss and Moore, 1992
Proterozoic	800	-24.4	Strauss and Moore, 1992
Proterozoic	800	-26.2	Strauss and Moore, 1992
Proterozoic	800	-25	Strauss and Moore, 1992
Proterozoic	800	-33	Strauss and Moore, 1992
Proterozoic	800	-31.7	Strauss and Moore, 1992
Proterozoic	800	-28.1	Strauss and Moore, 1992
Proterozoic	800	-28.1	Strauss and Moore, 1992
Proterozoic	800	-24.2	Strauss and Moore, 1992
Proterozoic	800	-26.1	Strauss and Moore, 1992
Proterozoic	800	-26.6	Strauss and Moore, 1992
Proterozoic	800	-24.4	Strauss and Moore, 1992
Proterozoic	800	-20.2	Strauss and Moore, 1992
Proterozoic	800	-24.8	Strauss and Moore, 1992
Proterozoic	800	-25.1	Strauss and Moore, 1992
Proterozoic	850	-32.2	Li et al., 2003
Proterozoic	850	-24.5	Logan et al., 1997
Proterozoic	850	-25.1	Logan et al., 1997
Proterozoic	850	-24.1	Logan et al., 1997
Proterozoic	850	-25.7	Logan et al., 1997
Proterozoic	850	-25.6	Logan et al., 1997
Proterozoic	850	-26.7	Strauss and Moore, 1992
Proterozoic	850	-24.2	Strauss and Moore, 1992
Proterozoic	850	-30.2	Strauss and Moore, 1992
Proterozoic	850	-27.7	Strauss and Moore, 1992
Proterozoic	850	-25.7	Strauss and Moore, 1992
Proterozoic	850	-29.4	Strauss and Moore, 1992
Proterozoic	862	-32	Strauss and Moore, 1992
Proterozoic	862	-27	Strauss and Moore, 1992
Proterozoic	891.335	-24.5915	Oehler et al., 1972
Proterozoic	892.337	-28.3003	Oehler et al., 1972
Proterozoic	896.077	-27.1463	Oehler et al., 1972
Proterozoic	900	-26.5	Li et al., 2003
Proterozoic	900	-24.4	Strauss and Moore, 1992
Proterozoic	900	-29.1	Strauss and Moore, 1992
Proterozoic	900	-26.1	Strauss and Moore, 1992
Proterozoic	900	-29.1	Strauss and Moore, 1992
Proterozoic	930	-30.4	Strauss and Moore, 1992
Proterozoic	940	-29.1	Strauss and Moore, 1992
Proterozoic	940	-28.5	Strauss and Moore, 1992
Proterozoic	950	-31.8	Li et al., 2003
Proterozoic	950	-28.2	Strauss and Moore, 1992
Proterozoic	985.952	-29.8631	Oehler et al., 1972
Proterozoic	988.134	-22.94	Oehler et al., 1972
Proterozoic	988.691	-25.0004	Oehler et al., 1972
Proterozoic	991.651	-20.9618	Oehler et al., 1972
Proterozoic	1000	-30.77	Stüeken and Prave, 2022
Proterozoic	1000	-30.54	Stüeken and Prave, 2022
Proterozoic	1000	-30.93	Stüeken and Prave, 2022
Proterozoic	1000	-31.3	Stüeken and Prave, 2022
Proterozoic	1000	-31.35	Stüeken and Prave, 2022
Proterozoic	1000	-31.43	Stüeken and Prave, 2022
Proterozoic	1000	-31.36	Stüeken and Prave, 2022
Proterozoic	1000	-30.95	Stüeken and Prave, 2022
Proterozoic	1000	-31.38	Stüeken and Prave, 2022
Proterozoic	1000	-29.85	Stüeken and Prave, 2022
Proterozoic	1000	-30.91	Stüeken and Prave, 2022
Proterozoic	1000	-31.4	Stüeken and Prave, 2022
Proterozoic	1000	-31.12	Stüeken and Prave, 2022
Proterozoic	1000	-30.71	Stüeken and Prave, 2022
Proterozoic	1000	-31.19	Stüeken and Prave, 2022
Proterozoic	1000	-30.92	Stüeken and Prave, 2022
Proterozoic	1000	-31.83	Stüeken and Prave, 2022
Proterozoic	1000	-30.9	Stüeken and Prave, 2022
Proterozoic	1000	-30.89	Stüeken and Prave, 2022
Proterozoic	1000	-30.53	Stüeken and Prave, 2022
Proterozoic	1000	-30.93	Stüeken and Prave, 2022
Proterozoic	1000	-30.72	Stüeken and Prave, 2022
Proterozoic	1000	-29.48	Stüeken and Prave, 2022
Proterozoic	1000	-29.02	Stüeken and Prave, 2022
Proterozoic	1000	-30.11	Stüeken and Prave, 2022
Proterozoic	1000	-29.74	Stüeken and Prave, 2022
Proterozoic	1000	-30.82	Stüeken and Prave, 2022
Proterozoic	1000	-30.97	Stüeken and Prave, 2022
Proterozoic	1000	-30.59	Stüeken and Prave, 2022
Proterozoic	1000	-29.62	Stüeken and Prave, 2022
Proterozoic	1000	-29.69	Stüeken and Prave, 2022
Proterozoic	1000	-30.03	Stüeken and Prave, 2022
Proterozoic	1000	-30.34	Stüeken and Prave, 2022
Proterozoic	1000	-29.01	Stüeken and Prave, 2022
Proterozoic	1000	-30.16	Stüeken and Prave, 2022
Proterozoic	1000	-30.11	Stüeken and Prave, 2022
Proterozoic	1000	-29.33	Stüeken and Prave, 2022
Proterozoic	1000	-29.98	Stüeken and Prave, 2022
Proterozoic	1000	-29.22	Stüeken and Prave, 2022
Proterozoic	1000	-30.63	Stüeken and Prave, 2022
Proterozoic	1000	-29.29	Stüeken and Prave, 2022
Proterozoic	1000	-30.41	Stüeken and Prave, 2022
Proterozoic	1000	-29.25	Stüeken and Prave, 2022
Proterozoic	1000	-27.47	Stüeken and Prave, 2022
Proterozoic	1000	-30.35	Stüeken and Prave, 2022
Proterozoic	1000	-29.99	Stüeken and Prave, 2022
Proterozoic	1000	-30.11	Stüeken and Prave, 2022
Proterozoic	1000	-30.05	Stüeken and Prave, 2022
Proterozoic	1000	-30.01	Stüeken and Prave, 2022
Proterozoic	1000	-31	Stüeken and Prave, 2022
Proterozoic	1000	-30.86	Stüeken and Prave, 2022
Proterozoic	1000	-30	Strauss and Moore, 1992
Proterozoic	1050	-26.5	Strauss and Moore, 1992
Proterozoic	1055	-34.3	Strauss and Moore, 1992
Proterozoic	1055	-26.8	Strauss and Moore, 1992
Proterozoic	1089.7	-23.9256	Oehler et al., 1972
Proterozoic	1100	-29.7	Blumenberg et al., 2012
Proterozoic	1100	-30.6	Blumenberg et al., 2012
Proterozoic	1100	-31.1	Blumenberg et al., 2012
Proterozoic	1100	-33.8	Blumenberg et al., 2012
Proterozoic	1150	-28.9	Li et al., 2003
Proterozoic	1185	-24.5	Strauss and Moore, 1992
Proterozoic	1185	-31.7	Strauss and Moore, 1992
Proterozoic	1190	-26.1	Strauss and Moore, 1992
Proterozoic	1200	-33.8	Li et al., 2003
Proterozoic	1200	-26.8	Strauss and Moore, 1992
Proterozoic	1240	-29.4	Li et al., 2003
Proterozoic	1240	-24.3	Strauss and Moore, 1992
Proterozoic	1240	-21.6	Strauss and Moore, 1992
Proterozoic	1240	-22.9	Strauss and Moore, 1992
Proterozoic	1240	-29.5	Strauss and Moore, 1992
Proterozoic	1250	-28.3	Strauss and Moore, 1992
Proterozoic	1250	-23.6	Strauss and Moore, 1992
Proterozoic	1250	-33.4	Strauss and Moore, 1992
Proterozoic	1260	-29.5	Li et al., 2003
Proterozoic	1260	-30.1	Strauss and Moore, 1992
Proterozoic	1280	-27.2	Li et al., 2003
Proterozoic	1285.79	-29.8532	Oehler et al., 1972
Proterozoic	1288.44	-24.6608	Oehler et al., 1972
Proterozoic	1300	-30.1	Li et al., 2003
Proterozoic	1320	-26.3	Strauss and Moore, 1992
Proterozoic	1325	-30.4	Strauss and Moore, 1992
Proterozoic	1339	-27.3	Strauss and Moore, 1992
Proterozoic	1340	-33.5	Strauss and Moore, 1992
Proterozoic	1350	-28.3	Strauss and Moore, 1992
Proterozoic	1350	-24.3	Strauss and Moore, 1992
Proterozoic	1350	-25.6	Strauss and Moore, 1992
Proterozoic	1360	-34.6	Cox et al., 2022
Proterozoic	1360	-33.58	Cox et al., 2022
Proterozoic	1360	-35.47	Cox et al., 2022
Proterozoic	1360	-33.79	Cox et al., 2022
Proterozoic	1360	-33.31	Cox et al., 2022
Proterozoic	1360	-33.83	Cox et al., 2022
Proterozoic	1360	-33.57	Cox et al., 2022
Proterozoic	1360	-34.56	Cox et al., 2022
Proterozoic	1360	-33.08	Cox et al., 2022
Proterozoic	1360	-33.15	Cox et al., 2022
Proterozoic	1360	-33.41	Cox et al., 2022
Proterozoic	1360	-33.3	Cox et al., 2022
Proterozoic	1360	-32.94	Cox et al., 2022
Proterozoic	1360	-33.32	Cox et al., 2022
Proterozoic	1360	-32.96	Cox et al., 2022
Proterozoic	1360	-32.81	Cox et al., 2022
Proterozoic	1360	-34.35	Cox et al., 2022
Proterozoic	1360	-32.53	Cox et al., 2022
Proterozoic	1360	-34.2369	Cox et al., 2022
Proterozoic	1360	-34.0692	Cox et al., 2022
Proterozoic	1360	-34.4204	Cox et al., 2022
Proterozoic	1360	-34.4603	Cox et al., 2022
Proterozoic	1360	-34.8623	Cox et al., 2022
Proterozoic	1360	-34.5055	Cox et al., 2022
Proterozoic	1360	-34.1559	Cox et al., 2022
Proterozoic	1360	-33.5248	Cox et al., 2022
Proterozoic	1360	-33.954	Cox et al., 2022
Proterozoic	1360	-32.6139	Cox et al., 2022
Proterozoic	1360	-33.3867	Cox et al., 2022
Proterozoic	1360	-33.2155	Cox et al., 2022
Proterozoic	1360	-33.2208	Cox et al., 2022
Proterozoic	1360	-33.3001	Cox et al., 2022
Proterozoic	1360	-33.1215	Cox et al., 2022
Proterozoic	1360	-33.2756	Cox et al., 2022
Proterozoic	1360	-33.0226	Cox et al., 2022
Proterozoic	1360	-33.0874	Cox et al., 2022
Proterozoic	1360	-32.8215	Cox et al., 2022
Proterozoic	1360	-32.4484	Cox et al., 2022
Proterozoic	1360	-32.95	Cox et al., 2022
Proterozoic	1360	-33.507	Cox et al., 2022
Proterozoic	1360	-34.1671	Cox et al., 2022
Proterozoic	1360	-34.3035	Cox et al., 2022
Proterozoic	1360	-34.4366	Cox et al., 2022
Proterozoic	1360	-32.8429	Cox et al., 2022
Proterozoic	1360	-34.0365	Cox et al., 2022
Proterozoic	1360	-34.5577	Cox et al., 2022
Proterozoic	1360	-33.9103	Cox et al., 2022
Proterozoic	1360	-35.2207	Cox et al., 2022
Proterozoic	1364	-25.3	Strauss and Moore, 1992
Proterozoic	1370	-33.1	Lou et al., 2015
Proterozoic	1370	-34.1	Lou et al., 2015
Proterozoic	1370	-33.6	Lou et al., 2015
Proterozoic	1370	-32.6	Lou et al., 2015
Proterozoic	1370	-32.8	Lou et al., 2015
Proterozoic	1380	-26	Strauss and Moore, 1992
Proterozoic	1400	-30.5	Strauss and Moore, 1992
Proterozoic	1420	-31.1	Strauss and Moore, 1992
Proterozoic	1420	-28.3	Strauss and Moore, 1992
Proterozoic	1425	-32	Strauss and Moore, 1992
Proterozoic	1435	-30.87	Stueken, 2013
Proterozoic	1435	-30.6	Stueken, 2013
Proterozoic	1435	-32.8	Stueken, 2013
Proterozoic	1435	-32.56	Stueken, 2013
Proterozoic	1435	-32	Stueken, 2013
Proterozoic	1435	-31.27	Stueken, 2013
Proterozoic	1435	-30.59	Stueken, 2013
Proterozoic	1435	-29.71	Stueken, 2013
Proterozoic	1435	-28.84	Stueken, 2013
Proterozoic	1435	-28.57	Stueken, 2013
Proterozoic	1435	-30	Stueken, 2013
Proterozoic	1435	-26.33	Stueken, 2013
Proterozoic	1435	-28.46	Stueken, 2013
Proterozoic	1435	-27.69	Stueken, 2013
Proterozoic	1435	-28.28	Stueken, 2013
Proterozoic	1435	-28.75	Stueken, 2013
Proterozoic	1435	-27.62	Stueken, 2013
Proterozoic	1435	-27.72	Stueken, 2013
Proterozoic	1435	-27.62	Stueken, 2013
Proterozoic	1435	-30.69	Stueken, 2013
Proterozoic	1435	-29.73	Stueken, 2013
Proterozoic	1435	-32.23	Stueken, 2013
Proterozoic	1435	-32.21	Stueken, 2013
Proterozoic	1435	-31.58	Stueken, 2013
Proterozoic	1435	-32	Stueken, 2013
Proterozoic	1435	-32.48	Stueken, 2013
Proterozoic	1435	-32.24	Stueken, 2013
Proterozoic	1435	-32.05	Stueken, 2013
Proterozoic	1435	-32.21	Stueken, 2013
Proterozoic	1435	-31.45	Stueken, 2013
Proterozoic	1435	-31.61	Stueken, 2013
Proterozoic	1435	-32.48	Stueken, 2013
Proterozoic	1435	-28.97	Stueken, 2013
Proterozoic	1435	-28.04	Stueken, 2013
Proterozoic	1435	-27.93	Stueken, 2013
Proterozoic	1435	-27.31	Stueken, 2013
Proterozoic	1435	-26.26	Stueken, 2013
Proterozoic	1435	-28.07	Stueken, 2013
Proterozoic	1435	-25.03	Stueken, 2013
Proterozoic	1435	-27.42	Stueken, 2013
Proterozoic	1435	-23.34	Stueken, 2013
Proterozoic	1435	-25.39	Stueken, 2013
Proterozoic	1435	-25.17	Stueken, 2013
Proterozoic	1435	-25.31	Stueken, 2013
Proterozoic	1435	-25.44	Stueken, 2013
Proterozoic	1435	-24.44	Stueken, 2013
Proterozoic	1435	-23.61	Stueken, 2013
Proterozoic	1435	-20.97	Stueken, 2013
Proterozoic	1435	-20.64	Stueken, 2013
Proterozoic	1435	-20.85	Stueken, 2013
Proterozoic	1435	-20.01	Stueken, 2013
Proterozoic	1435	-19.74	Stueken, 2013
Proterozoic	1435	-20.09	Stueken, 2013
Proterozoic	1435	-18.56	Stueken, 2013
Proterozoic	1435	-19.5	Stueken, 2013
Proterozoic	1435	-19.82	Stueken, 2013
Proterozoic	1435	-20.96	Stueken, 2013
Proterozoic	1435	-31.31	Stueken, 2013
Proterozoic	1435	-31.04	Stueken, 2013
Proterozoic	1435	-30.99	Stueken, 2013
Proterozoic	1435	-32.4	Stueken, 2013
Proterozoic	1435	-32.38	Stueken, 2013
Proterozoic	1435	-30.89	Stueken, 2013
Proterozoic	1435	-31.08	Stueken, 2013
Proterozoic	1435	-32.73	Stueken, 2013
Proterozoic	1435	-33.13	Stueken, 2013
Proterozoic	1435	-34.09	Stueken, 2013
Proterozoic	1435	-34.22	Stueken, 2013
Proterozoic	1435	-33.46	Stueken, 2013
Proterozoic	1440	-32.3	Strauss and Moore, 1992
Proterozoic	1440	-26.4	Strauss and Moore, 1992
Proterozoic	1440	-32	Strauss and Moore, 1992
Proterozoic	1450	-32.1	Li et al., 2003
Proterozoic	1450	-23.1	Strauss and Moore, 1992
Proterozoic	1450	-23.9	Strauss and Moore, 1992
Proterozoic	1480	-32.4	Li et al., 2003
Proterozoic	1540	-29.7	Li et al., 2003
Proterozoic	1560	-28.5	Li et al., 2003
Proterozoic	1580	-30.3	Li et al., 2003
Proterozoic	1585.42	-29.1016	Oehler et al., 1972
Proterozoic	1585.73	-30.2554	Oehler et al., 1972
Proterozoic	1585.91	-30.9148	Oehler et al., 1972
Proterozoic	1586.18	-31.9038	Oehler et al., 1972
Proterozoic	1600	-31.7	Beaumont et Robert, 1999
Proterozoic	1600	-31.7	Beaumont et Robert, 1999
Proterozoic	1630	-31	Li et al., 2003
Proterozoic	1650	-32.8	Li et al., 2003
Proterozoic	1650	-28.8	Strauss and Moore, 1992
Proterozoic	1670	-28.5	Strauss and Moore, 1992
Proterozoic	1680	-30.5	Li et al., 2003
Proterozoic	1684.98	-22.6698	Oehler et al., 1972
Proterozoic	1686.34	-27.6972	Oehler et al., 1972
Proterozoic	1690	-32.4	Li et al., 2003
Proterozoic	1690	-32.6	Strauss and Moore, 1992
Proterozoic	1700	-31.9	Li et al., 2003
Proterozoic	1700	-31.5	Strauss and Moore, 1992
Proterozoic	1700	-27.4	Strauss and Moore, 1992
Proterozoic	1700	-26.8	Strauss and Moore, 1992
Proterozoic	1700	-29.2	Strauss and Moore, 1992
Proterozoic	1710	-33.6	Li et al., 2003
Proterozoic	1730	-32.7	Li et al., 2003
Proterozoic	1789.51	-34.6169	Oehler et al., 1972
Proterozoic	1790.17	-37.0894	Oehler et al., 1972
Proterozoic	1792	-28.8475	Oehler et al., 1972
Proterozoic	1792.27	-29.8365	Oehler et al., 1972
Proterozoic	1796.58	-30.8254	Oehler et al., 1972
Proterozoic	1796.9	-31.9793	Oehler et al., 1972
Proterozoic	1797.68	-19.8638	Oehler et al., 1972
Proterozoic	1850	-33.1	Strauss and Moore, 1992
Proterozoic	1884.66	-26.8665	Oehler et al., 1972
Proterozoic	1885	-30.6	Strauss and Moore, 1992
Proterozoic	1893.25	-28.6794	Oehler et al., 1972
Proterozoic	1897.95	-31.0693	Oehler et al., 1972
Proterozoic	1900	-32	Strauss and Moore, 1992
Proterozoic	1900	-30.5	Strauss and Moore, 1992
Proterozoic	1900	-26.4	Strauss and Moore, 1992
Proterozoic	1900	-30.2	Strauss and Moore, 1992
Proterozoic	1900	-39.4	Strauss and Moore, 1992
Proterozoic	1925	-25.8	Strauss and Moore, 1992
Proterozoic	1925	-25.6	Strauss and Moore, 1992
Proterozoic	1940	-31.79	Wilton, 1996
Proterozoic	1940	-32.21	Wilton, 1996
Proterozoic	1940	-32.22	Wilton, 1996
Proterozoic	1940	-32.23	Wilton, 1996
Proterozoic	1950	-32.3	Strauss and Moore, 1992
Proterozoic	1984.71	-22.2478	Oehler et al., 1972
Proterozoic	1989.09	-23.4839	Oehler et al., 1972
Proterozoic	1991.43	-32.1377	Oehler et al., 1972
Proterozoic	1991.94	-34.0333	Oehler et al., 1972
Proterozoic	1993.43	-39.5552	Oehler et al., 1972
Proterozoic	1994.37	-28.0167	Oehler et al., 1972
Proterozoic	2000	-34.3	Beaumont et Robert, 1999
Proterozoic	2000	-31.4	Beaumont et Robert, 1999
Proterozoic	2000	-31.2	Beaumont et Robert, 1999
Proterozoic	2000	-32.3	Beaumont et Robert, 1999
Proterozoic	2000	-32.1	Beaumont et Robert, 1999
Proterozoic	2000	-31.7	Beaumont et Robert, 1999
Proterozoic	2000	-33.9	Beaumont et Robert, 1999
Proterozoic	2000	-33.2	Beaumont et Robert, 1999
Proterozoic	2090.25	-37.9861	Oehler et al., 1972
Proterozoic	2090.99	-40.7058	Oehler et al., 1972
Proterozoic	2100	-40.6	Beaumont et Robert, 1999
Proterozoic	2100	-40.5	Beaumont et Robert, 1999
Proterozoic	2100	-28.9	Beaumont et Robert, 1999
Proterozoic	2100	-28.9	Beaumont et Robert, 1999
Proterozoic	2100	-35.1	Beaumont et Robert, 1999
Proterozoic	2100	-35.1	Beaumont et Robert, 1999
Proterozoic	2100	-34.8	Beaumont et Robert, 1999
Proterozoic	2191.44	-37.5706	Oehler et al., 1972
Proterozoic	2193.02	-28.4222	Oehler et al., 1972
Proterozoic	2193.26	-29.3288	Oehler et al., 1972
Proterozoic	2194.13	-32.5431	Oehler et al., 1972
Proterozoic	2199.96	-24.1363	Oehler et al., 1972
Archean	2500	-41.5	Brocks et al., 2003
Archean	2500	-32.2	Brocks et al., 2003
Archean	2500	-33.5	Brocks et al., 2003
